# Supplementary material for: Establishing breast feeding in infants with Down syndrome: the FADES cohort experience
Source: PubMed Central journal article supplement — BMJ Paediatr Open. 2022 Nov 10;6(1):e001547. doi: 10.1136/bmjpo-2022-001547 (PMC9660693; doi:10.1136/bmjpo-2022-001547), 2022-11-10
Supplement: bmjpo-2022-001547.draft_revisions.pdf [file bmjpo-2022-001547.draft_revisions.pdf]

# BMJ Paediatrics Open

BMJ Paediatrics Open is committed to open peer review. As part of this commitment we make the peer review history of every article we publish publicly available.

When an article is published we post the peer reviewers' comments and the authors' responses online. We also post the versions of the paper that were used during peer review. These are the versions that the peer review comments apply to.

The versions of the paper that follow are the versions that were submitted during the peer review process. They are not the versions of record or the final published versions. They should not be cited or distributed as the published version of this manuscript.

BMJ Paediatrics Open is an open access journal and the full, final, typeset and author-corrected version of record of the manuscript is available on our site with no access controls, subscription charges or pay-per-view fees (<http://bmjpaedsopen.bmj.com>).

If you have any questions on BMJ Paediatrics Open's open peer review process please email [info.bmjpo@bmj.com](mailto:info.bmjpo@bmj.com)

# BMJ Paediatrics Open

## Establishing breast feeding in babies with Down's syndrome: the FADES cohort experience

|                               |                                                                                                                                                                                                                                                                                                                                                                                                                                                                                                                                                                                                                |
|-------------------------------|----------------------------------------------------------------------------------------------------------------------------------------------------------------------------------------------------------------------------------------------------------------------------------------------------------------------------------------------------------------------------------------------------------------------------------------------------------------------------------------------------------------------------------------------------------------------------------------------------------------|
| Journal:                      | <i>BMJ Paediatrics Open</i>                                                                                                                                                                                                                                                                                                                                                                                                                                                                                                                                                                                    |
| Manuscript ID                 | bmjpo-2022-001547                                                                                                                                                                                                                                                                                                                                                                                                                                                                                                                                                                                              |
| Article Type:                 | Original research                                                                                                                                                                                                                                                                                                                                                                                                                                                                                                                                                                                              |
| Date Submitted by the Author: | 15-May-2022                                                                                                                                                                                                                                                                                                                                                                                                                                                                                                                                                                                                    |
| Complete List of Authors:     | Williams, Georgina; NIHR Bristol Biomedical Research Centre; University of Bristol, Translational Health Sciences<br>Leary, Sam; NIHR Bristol Biomedical Research Centre<br>Leadbetter, Sofia; NIHR Bristol Biomedical Research Centre<br>Toms, Stu; NIHR Bristol Biomedical Research Centre<br>Mortimer, Georgina ; University of Bristol, Translational Health Sciences<br>Scorrer, Tim; Portsmouth Hospitals University NHS Trust, Neonatology<br>Gillespie, Kathleen; University of Bristol, Translational Health Sciences<br>Shield, Julian; University of Bristol, Biomedical Research Unit in Nutrition |
| Keywords:                     | Epidemiology, Syndrome                                                                                                                                                                                                                                                                                                                                                                                                                                                                                                                                                                                         |
|                               |                                                                                                                                                                                                                                                                                                                                                                                                                                                                                                                                                                                                                |

SCHOLARONE™  
Manuscripts

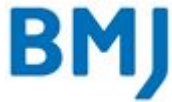

I, the Submitting Author has the right to grant and does grant on behalf of all authors of the Work (as defined in the below author licence), an exclusive licence and/or a non-exclusive licence for contributions from authors who are: i) UK Crown employees; ii) where BMJ has agreed a CC-BY licence shall apply, and/or iii) in accordance with the terms applicable for US Federal Government officers or employees acting as part of their official duties; on a worldwide, perpetual, irrevocable, royalty-free basis to BMJ Publishing Group Ltd ("BMJ") its licensees and where the relevant Journal is co-owned by BMJ to the co-owners of the Journal, to publish the Work in this journal and any other BMJ products and to exploit all rights, as set out in our [licence](#).

The Submitting Author accepts and understands that any supply made under these terms is made by BMJ to the Submitting Author unless you are acting as an employee on behalf of your employer or a postgraduate student of an affiliated institution which is paying any applicable article publishing charge ("APC") for Open Access articles. Where the Submitting Author wishes to make the Work available on an Open Access basis (and intends to pay the relevant APC), the terms of reuse of such Open Access shall be governed by a Creative Commons licence – details of these licences and which [Creative Commons](#) licence will apply to this Work are set out in our licence referred to above.

Other than as permitted in any relevant BMJ Author's Self Archiving Policies, I confirm this Work has not been accepted for publication elsewhere, is not being considered for publication elsewhere and does not duplicate material already published. I confirm all authors consent to publication of this Work and authorise the granting of this licence.

1  
2  
3 **Title Page:**  
4

5 **Establishing breast feeding in babies with Down's syndrome: the**  
6  
7  
8 **FADES cohort experience**  
9

10  
11 Georgina M.G. Williams<sup>1,2,3,4</sup>, Sam Leary<sup>1</sup>, Sofia Leadbetter<sup>1</sup>, Stu Toms<sup>1</sup>, Georgina  
12  
13 Mortimer<sup>2</sup>, Tim Scorrer<sup>5</sup>, Kathleen Gillespie<sup>2</sup>, Julian Hamilton Shield<sup>1,2,3</sup>  
14  
15

16  
17  
18 Affiliations:  
19

20 <sup>1</sup>NIHR Bristol Biomedical Research Centre Nutrition Theme, University of Bristol, Bristol, England  
21

22 <sup>2</sup>Translational Health Sciences, University of Bristol, Bristol, England  
23

24 <sup>3</sup>Bristol Royal Hospital for Children, University Hospitals Bristol and Weston NHS Foundation Trust, Bristol,  
25  
26 England  
27

28 <sup>4</sup>Noah's Ark Children's Hospital for Wales, Cardiff and Vale University Health Board,  
29

30 <sup>5</sup>Portsmouth Hospitals University NHS Trust. Portsmouth, England.  
31  
32

33  
34 Corresponding Author:  
35

36 Dr Georgina Williams  
37

38 NIHR Biomedical Research Centre Bristol Nutrition Theme  
39

40 Level 3,  
41

42 University Hospitals Bristol Education & Research Centre  
43  
44

45 Upper Maudlin Street, Bristol  
46

47 BS2 8AE  
48  
49  
50  
51

52 Funding Source: NIHR Bristol Biomedical Research Centre Nutrition Theme, University of  
53  
54 Bristol, Bristol, England  
55  
56  
57

58  
59 Word Count: 2551 words  
60

**Abstract:**

Objective: To describe breast feeding prevalence, and maternal experience in infants with Trisomy 21.

Design: Longitudinal cohort study

Setting: Participants from UK recruited through websites, social media and local collaborators: neonatologists, community paediatricians and research nurses.

Subjects: Babies under the age of 8 months with Down's syndrome (DS) recruited between the 1<sup>st</sup> September 2014 to 31<sup>st</sup> August 2017. Seventy participants: median age 20 weeks (Interquartile range (IQR) 13, 29 weeks) at initial questionnaire.

Main outcome measure: Breastfeeding prevalence at 6 weeks and 6 months amongst babies with DS.

Results: The prevalence of exclusive breastfeeding amongst study participants was similar to the general population (21% vs 23% at 6 weeks, 4% vs 1% at 6 months). However, the prevalence of breastfeeding (exclusive or combination feeding) amongst the study participants was higher than the general population (64% vs 55% at 6 weeks, 54% vs 34% at 6 months).

Conclusion: Although there may be challenges in establishing breastfeeding in babies with DS, our data suggest that exclusive breastfeeding is possible for some, and the prevalence of breastfeeding is comparable to the prevalence in the general population.

Trial Registration: ISRCTN 12415856

**Keywords: Down's Syndrome, Trisomy 21, Feeding, Breast-feeding,**

## Background

Down's syndrome (DS) is caused by trisomy of chromosome 21. DS is usually diagnosed in the first few days of life by recognition of salient features (1). A number of associated conditions including congenital heart disease and gastrointestinal complications can cause additional challenges during the neonatal period. Infants with DS may have oral, anatomical and physiological abnormalities affecting their ability to feed normally: as with other features of DS there is phenotypic variability. To breastfeed effectively, a tight oral/nipple seal needs to be induced with the tongue making a groove and the lips sealing around the nipple. For a baby with DS, the flattened shape of the tongue and low tone in the oral structures means that establishing breastfeeding may be challenging. (2,3). Lewis et al reported that 40% of DS babies had been NG tube fed during the neonatal period illustrating some of the issues with feeding (4). Current World Health Organisation (WHO) recommendations are that babies should be exclusively breastfed until 6 months (5), this is based on the health benefits for mother and baby. Prolonged exclusive breastfeeding is possibly protective against some autoimmune conditions including type 1 diabetes and coeliac disease for which children with DS are at increased risk (6,7,8). Furthermore, there is evidence that breastfeeding exclusively or combined feeding to a lesser but significant extent, enhances immunity and is protective against otitis media and respiratory tract infections (9) both being more prevalent in children with DS (10).

Many countries have registers which provide data on people with DS. These have facilitated retrospective studies providing statistics on for example: birth and death rates and congenital anomalies. However longitudinal birth cohort studies of infants with DS in the UK are rare (11,12,13,14). The FADES (Feeding and Autoimmunity in Down's Syndrome Evaluation

1  
2  
3 Study) was established to investigate early feeding and the development of autoimmunity.  
4  
5 Medical and detailed feeding data are collected by mothers from birth and includes both  
6  
7 feeding in the hospital settings and at home. A study hypothesis is that babies with DS have  
8  
9 difficulties with establishing breast feeding and are therefore introduced to formula feeds at  
10  
11 an earlier age. This paper describes findings from the analysis of the feeding data collected  
12  
13 between September 2014 and August 2017.  
14  
15  
16  
17  
18

### 19 **Methods:**

20  
21  
22  
23  
24 FADES is an ongoing UK wide study recruiting babies with DS antenatally or in the first  
25  
26 eight months of life. Exclusion criteria are babies born with a child protection plan, fostered  
27  
28 or adopted, >8 months or parents do not speak English. Participants are recruited either by  
29  
30 health professionals including neonatologists, community paediatricians and research nurses  
31  
32 or via web recruitment through the Downs Syndrome Association, Downs Syndrome  
33  
34 Scotland, and other websites and social media [https://www.bristolbrc.nihr.ac.uk/our-](https://www.bristolbrc.nihr.ac.uk/our-research/nutrition-diet-and-lifestyle/childhood/fades-study-2/)  
35  
36 [research/nutrition-diet-and-lifestyle/childhood/fades-study-2/](https://www.bristolbrc.nihr.ac.uk/our-research/nutrition-diet-and-lifestyle/childhood/fades-study-2/). A combined feeding and  
37  
38 medical questionnaire is completed by families at recruitment (initial questionnaire), at six to  
39  
40 eight months of life (7-month questionnaire) and then at 12 months (12-month questionnaire).  
41  
42 Feeding questions are based on those from the Infant Feeding Survey (IFS) 2010 (15),  
43  
44 medical questions are related to conditions associated with DS, hospital admissions and  
45  
46 antibiotic usage. Mothers are able to provide free text answers to some questions. This paper  
47  
48 presents data collected in the first three years of recruitment from 1<sup>st</sup> September 2014 to 31<sup>st</sup>  
49  
50 August 2017 when the feasibility assessment was conducted.  
51  
52  
53  
54  
55  
56  
57  
58  
59  
60

1  
2  
3 **Statistical Analysis:** As a feasibility study, analysis of the questionnaires is descriptive as  
4 numbers are too small for statistical testing. Frequencies were derived and presented as  
5 percentages for categorical variables. For continuous data, means and standard deviations  
6 (SDs) were presented for data that were approximately normal, and medians and interquartile  
7 ranges (IQRs) for non-normal data. Analysis used STATA vs. 15.  
8  
9

10  
11  
12  
13  
14  
15  
16  
17 **Public involvement:** The study design including recruitment and data collection methods  
18 were established following discussion with and involvement of the Downs Syndrome  
19 Association. Local members (all of whom were parents of a child with DS) advised on the  
20 wording and feasibility of the feeding and medical questionnaires.  
21  
22  
23  
24  
25

26  
27  
28  
29  
30  
31  
32  
33  
34  
35  
36  
37  
38  
39  
40  
41  
42  
43  
44  
45  
46  
47  
48  
49  
50  
51  
52  
53  
54  
55  
56  
57  
58  
59  
60  
Ethics approval for FADES was given by the National Research Ethics Service (NRES)  
Committee South West – Central Bristol 23<sup>rd</sup> April 2014 14/SW/0030 and it is an NIHR  
Portfolio study.

## Results:

Seventy participants were recruited between the 1<sup>st</sup> September 2014 and the 31<sup>st</sup> August  
2017. 87% (61 of 70) completed the initial feeding and medical questionnaire at a median age  
of 20 weeks (IQR 13, 29 weeks). Of these, approximately a quarter (n=15) were diagnosed  
antenatally with DS. Table 1 summarises maternal characteristics and birth details. Over half  
were born by normal vaginal delivery: median gestation, 38 weeks (IQR 37, 39 weeks), mean  
birthweight of 3kg (SD 0.5kg). Most babies were born in hospital units, three were home  
deliveries. Median hospital stay after birth was five days (IQR 3, 9 days).



| Background Characteristics                                       |                                   |       |         |
|------------------------------------------------------------------|-----------------------------------|-------|---------|
| Maternal age (years) at time of completing initial questionnaire | 20 to 24                          | 8.2%  | (5/61)  |
|                                                                  | 25 to 29                          | 9.8%  | (6/61)  |
|                                                                  | 30 to 34                          | 24.6% | (15/61) |
|                                                                  | 35 to 39                          | 37.7% | (23/61) |
|                                                                  | 40 or over                        | 19.7% | (12/61) |
| Mother's marital status                                          | Living together                   | 27.9% | (17/61) |
|                                                                  | Married or in a civil partnership | 65.6% | (40/61) |
|                                                                  | Single                            | 4.9%  | (3/61)  |
|                                                                  | Widowed, divorced, or separated   | 1.6%  | (1/61)  |
| Mother's ethnic group                                            | Other                             | 3.3%  | (2/61)  |
|                                                                  | White British                     | 86.9% | (53/61) |
|                                                                  | White Irish                       | 4.9%  | (3/61)  |
|                                                                  | White Other                       | 4.9%  | (3/61)  |
| Birth History                                                    |                                   |       |         |
| First baby                                                       |                                   | 31.2% | (19/61) |
| Prenatal diagnosis of DS                                         |                                   | 24.6% | (15/61) |
| Twin Birth                                                       |                                   | 3.3%  | (2/61)  |
| Type of delivery                                                 | Normal Vaginal delivery           | 63.3% | (38/60) |
|                                                                  | C-Section                         | 28.3% | (17/60) |
|                                                                  | Forceps                           | 3.3%  | (2/60)  |
|                                                                  | Ventouse                          | 5.0%  | (3/60)  |
| Gestation (weeks)                                                | Median 38 (IQR 37, 39)            |       |         |
| Pre-term 32-37 weeks                                             |                                   | 21.3% | (13/61) |
| Birthweight (kg)                                                 | Mean 3.0 (0.5 SD)                 |       |         |
| Location of birth                                                | At home                           | 5.0%  | (3/59)  |
|                                                                  | In hospital (consultant led)      | 49.2% | (29/59) |
|                                                                  | In hospital (midwife led)         | 42.4% | (25/59) |
|                                                                  | Birth centre (midwife led)        | 3.4%  | (2/59)  |
| Length of initial hospital stay (hours)                          | Median 120 (IQR 72, 216)          |       |         |

Table 1: Maternal characteristics and birth details

Footnote: DS (Down's syndrome), IQR (inter quartile range), SD (standard deviation), C-section (Caesarean Section)

Over half (56%) were admitted into a special care baby unit (SCBU) with almost a third of these (29%) primarily due to poor feeding. Half of the babies for whom data were available, required naso-gastric (NG) tube feeding as shown in Table 2. All admitted to SCBU, were

1  
2  
3 NG tube fed. Around 40%, primarily required NG tube feeds in SCBU due to feeding issues,  
4  
5 the remainder due to medical co-morbidities (37% with multiple medical indications). NG  
6  
7 tube feeds were mostly expressed breastmilk or a mixture of expressed milk and infant  
8  
9 formula. Just over 60% required NG tube feeds for less than two weeks.  
10  
11  
12  
13  
14  
15  
16  
17  
18  
19  
20  
21  
22  
23  
24  
25  
26  
27  
28  
29  
30  
31  
32  
33  
34  
35  
36  
37  
38  
39  
40  
41  
42  
43  
44  
45  
46  
47  
48  
49  
50  
51  
52  
53  
54  
55  
56  
57  
58  
59  
60

Confidential: For Review Only

| SCBU Admission                                                                 |                                          |                     |          |
|--------------------------------------------------------------------------------|------------------------------------------|---------------------|----------|
| Admitted to SCBU                                                               |                                          | 55.7%               | (34/61)  |
| Admitted to SCBU due to problems with feeding                                  |                                          | 29.4%               | (10/34)  |
| Admitted to SCBU for any other reason*                                         |                                          | 70.6%               | (24/34)  |
| Hypoxia / respiratory distress / PPHN                                          |                                          | 50.0%               | (17/34)  |
| Jaundice                                                                       |                                          | 20.6%               | (7/34)   |
| Cardiac / cardiac monitoring                                                   |                                          | 11.8%               | (4/34)   |
| Infection                                                                      |                                          | 11.8%               | (4/34)   |
| Prematurity                                                                    |                                          | 8.8%                | (3/34)   |
| Polycythaemia                                                                  |                                          | 5.9%                | (2/34)   |
| Other                                                                          |                                          | 20.6%               | (7/34)   |
| Length of SCBU stay (weeks)                                                    |                                          | Median 2 (IQR 2, 4) |          |
| Feeding in SCBU and NG tube Feeds                                              |                                          |                     |          |
| SCBU admission affected ability of mother to feed baby as she would have liked |                                          | 67.7 %              | (23/34)  |
| Shown how to express milk in SCBU                                              |                                          | 85.3 %              | (29/34)  |
| Felt supported to express milk in SCBU                                         |                                          | 90.0 %              | (27/30)  |
| Had NG tube feeds                                                              |                                          | 100 %               | (31/31*) |
| Required NG tube feeds due to problems with feeding                            |                                          | 38.7 %              | (12/31)  |
| Medical reason for NG tube feeds**                                             | Prematurity                              | 10.5 %              | (2/19)   |
|                                                                                | Dehydration / hydration                  | 10.5 %              | (2/19)   |
|                                                                                | Ventilation                              | 10.5 %              | (2/19)   |
|                                                                                | Respiratory problems                     | 42.1 %              | (8/19)   |
|                                                                                | Jaundice / polycythaemia                 | 21.1 %              | (4/19)   |
|                                                                                | Vomiting or surgical abdomen             | 21.1 %              | (4/19)   |
| Length of time NG tube fed                                                     | < 3 days                                 | 16.1 %              | (5/31)   |
|                                                                                | > 3 to 7 days                            | 19.4 %              | (6/31)   |
|                                                                                | > 1 to 2 weeks                           | 25.8 %              | (8/31)   |
|                                                                                | > 2 to 4 weeks                           | 19.4 %              | (6/31)   |
|                                                                                | > 1 to 2 months                          | 16.1 %              | (5/31)   |
|                                                                                | > 2months                                | 3.2 %               | (1/31)   |
| Type of NG tube feeds given                                                    | Only expressed breast milk               | 32.3 %              | (10/31)  |
|                                                                                | Only infant formula                      | 6.5 %               | (2/31)   |
|                                                                                | Expressed breast milk and infant formula | 61.3 %              | (19/31)  |
| Feeds stopped and IV fluids given                                              |                                          | 32.4 %              | (11/34)  |
| Length of time on IV fluids                                                    | < 3 days                                 | 22.2 %              | (2/9)    |
|                                                                                | > 3 to 7 days                            | 44.4 %              | (4/9)    |
|                                                                                | > 7 days to 1 month                      | 33.3 %              | (3/9)    |

Table 2: Feeding in SCBU (special care baby unit) and NG (nasogastric) tube feeds

Footnote: IV fluids (Intra- venous fluids), PPHN (persistent pulmonary hypertension of the newborn),

\*Due to an issue with branching of the questions at least 31 babies were NG tube fed but there may have been more. Where they were branched away, people have been counted as missing, so the denominator is 31.

\*\*Coded from open response

1  
2  
3  
4  
5  
6 Of the mothers receiving an antenatal diagnosis for their baby, 87% were told about problems  
7  
8 relating to feeding but only 20% received any specific antenatal advice about breastfeeding a  
9  
10 baby with DS. Most mothers initially breastfed their baby, with 78% having skin to skin  
11  
12 contact within 24 hours of birth (Table 3). Feeding problems that were experienced in the  
13  
14 hospital or birthing centre by mothers, included those commonly associated with babies with  
15  
16 DS such as poor latch and lethargy. Although hypotonia is one of the explanations frequently  
17  
18 given as a cause for feeding difficulties, only one parent described this feature. Mothers  
19  
20 provided responses to an open question regarding feeding their baby in the hospital, birth  
21  
22 centre or unit as illustrated in the quotes in Table 4.  
23  
24  
25  
26  
27  
28  
29  
30  
31  
32  
33  
34  
35  
36  
37  
38  
39  
40  
41  
42  
43  
44  
45  
46  
47  
48  
49  
50  
51  
52  
53  
54  
55  
56  
57  
58  
59  
60

| First Feeds                                                                        |                                |        |            |
|------------------------------------------------------------------------------------|--------------------------------|--------|------------|
| Ever breastfed or received expressed breast milk                                   |                                | 90.2 % | (55/61)    |
| Had skin to skin contact within 24hrs of birth                                     |                                | 78.3 % | (47/60)    |
| Maternal health problems after birth that affected feeding                         |                                | 6.6 %  | (4/61)     |
| Received help with breastfeeding within first few days                             |                                | 66.7 % | (40/60)    |
| How soon after birth was baby put to the breast                                    | within a few minutes           | 25.5 % | (14/55)    |
|                                                                                    | <30 min                        | 30.9 % | (17/55)    |
|                                                                                    | 30 min to 1 hr                 | 16.4 % | (9/55)     |
|                                                                                    | >1 hr to 8 hrs                 | 5.5 %  | (3/55)     |
|                                                                                    | >8 hrs to 24 hrs               | 5.5 %  | (3/55)     |
|                                                                                    | > 24 hrs later                 | 16.4 % | (9/55)     |
| Experienced problems when feeding their baby in the hospital, birth centre or unit |                                | 77.5 % | (45/58*)   |
| Common problems with feeding**                                                     | Poor latch                     | 44.4 % | (20/45)    |
|                                                                                    | Medical issue                  | 31.1 % | (14/45)    |
|                                                                                    | Jaundice                       | 31.1 % | (14/45)    |
|                                                                                    | Tired / lethargic              | 28.9 % | (13/45)    |
|                                                                                    | Maternal reason                | 8.9 %  | (4/45)     |
|                                                                                    | Tongue size/ position          | 6.7 %  | (3/45)     |
|                                                                                    | Low tone                       | 2.2 %  | (1/45)     |
| Reported that they received enough help with feeding in hospital / birth centre    |                                | 82.8 % | (48/58)    |
| General Feeding and feeding after discharge from hospital / birth centre           |                                |        |            |
| Problems with feeding baby after discharge from hospital / birth centre            |                                | 53.6%  | (30/56)    |
| Problems with feeding after discharge**                                            |                                |        |            |
|                                                                                    | Lethargy                       | 21.3%  | (13/61)    |
|                                                                                    | Poor weight gain / weight loss | 16.4%  | (10/61)    |
|                                                                                    | Low tone                       | 1.6%   | (1/61)     |
|                                                                                    | Latch                          | 8.2%   | (5/61)     |
|                                                                                    | Medical                        | 4.9%   | (3/61)     |
|                                                                                    | Jaundice                       | 4.9%   | (3/61)     |
|                                                                                    | Reflux                         | 4.9%   | (3/61)     |
| Received help or information with feeding problems after discharge                 |                                | 84.4%  | (27/32***) |

Table 3: First feeds and feeding after discharge

Footnote:\* Three babies were home births \*\* These problems were coded from open responses

\*\*\*This denominator comes from the 30 participants who experienced problems with feeding after discharge from hospital and two who experienced problems with feeding after their home birth.

|                                                            |                                                                                                                                                                                                                                                                                                                                                                                                                                                                                                                                                                                                                                                                                                                                                                                                                                                  |
|------------------------------------------------------------|--------------------------------------------------------------------------------------------------------------------------------------------------------------------------------------------------------------------------------------------------------------------------------------------------------------------------------------------------------------------------------------------------------------------------------------------------------------------------------------------------------------------------------------------------------------------------------------------------------------------------------------------------------------------------------------------------------------------------------------------------------------------------------------------------------------------------------------------------|
| Question from initial questionnaire                        | <b>‘Were there any problems feeding your baby while you were in the hospital, birth centre or unit? What problems were there?’</b>                                                                                                                                                                                                                                                                                                                                                                                                                                                                                                                                                                                                                                                                                                               |
| Quotes                                                     | <p><i>“X would not take anything from the breast and was very sleepy so had an NG tube put in.”</i></p> <p><i>“A feeding tube was inserted straight away, which prevented me from breast feeding. It also prevented her from becoming hungry enough to feed from me”</i></p> <p><i>“baby continually pushing tongue out and could not latch on. Decided to try the bottle which she took immediately so did not try breast again and was not questioned by staff”</i></p>                                                                                                                                                                                                                                                                                                                                                                        |
| Question from Initial, 7 month and 12 month questionnaire  | <b>‘Have you stopped breastfeeding (no longer give your baby any expressed milk or put your baby to your breast)? What were your reasons for stopping?’</b>                                                                                                                                                                                                                                                                                                                                                                                                                                                                                                                                                                                                                                                                                      |
| Quotes                                                     | <p><i>“Significant weight loss in early days, poor latch, inadequate milk being taken by baby, readmission to hospital for tube feeding, introduction of bottle feeding in hospital, milk supply subsequently drying up due to baby being put on bottle and use of pumps further made milk supply deteriorate.”</i></p> <p><i>“Baby fell asleep too much at the breast to feed properly. It was too time consuming and stressful to keep expressing.”</i></p>                                                                                                                                                                                                                                                                                                                                                                                    |
| Question from initial, 7-month and 12-month questionnaires | <b>‘What would have helped you breastfeed longer?’</b>                                                                                                                                                                                                                                                                                                                                                                                                                                                                                                                                                                                                                                                                                                                                                                                           |
| Quotes                                                     | <p><i>“Knowing as I do now that it's common to have feeding problems with Down syndrome. More specific breastfeeding support.” (from initial questionnaire)</i></p> <p><i>“I feel I was forced to give Child’s name a bottle when she was only a day old as the midwife was unwilling to entertain my concerns about the bottle meaning that she would never take the breast. I had wanted to give the milk by syringe or cup to give her a chance to keep trying the breast, but I was shot down and ridiculed.” (from 7-month questionnaire)</i></p> <p><i>“I just became too sick, unwell but at the same time I fed longer than I thought I would. Thanks to the support I received.” (from 12-month questionnaire)</i></p> <p><i>“She lost 6% of her birth weight by day 9 and the NICU home midwife suggested we move onto top up.</i></p> |

*I think that was the pinch point. If I had said no, let's try harder to feed from the breast it might have established itself. But she had just been discharged from hospital and I was so reluctant to go back. You really have the threat of readmission hanging over you... I would have loved to feed her myself. It is my biggest sadness but there were too many other variables at play. I am pleased I was able to exclusively breast feed her though for well over 4 months." (from 12-month questionnaire)*

Table 4: Quotes from free text boxes in initial, 7 month and 12 month questionnaire

Of the 61 mother/baby dyads, 64% continued some breastfeeding for over six weeks (Table 5) (including babies who received mixed infant formula and breastmilk feeds). Over the age of six months, this decreased to 54% still breastfeeding in part. These percentages are higher than in the general population, levels reported in the Infant Feeding Survey (IFS) 2010 (55% and 34% respectively) (15). The prevalence of exclusive breastfeeding in the study population at six weeks was 21% compared to 23% in the general population in the IFS 2010 (15). By six months of age, less than 4% of participants were exclusively breast fed (2/54). This compares to 1% of general population. Using data from the initial and 7-month questionnaires, the median age at which some formula milk was introduced in the whole cohort was five days (IQR 1, 21 days). Formula feeds were introduced by 52% of mothers within a week in the IFS 2010 and 75% by 6 weeks.

| Types of feeds / Stopping breastfeeding             |                          |                          |                           |
|-----------------------------------------------------|--------------------------|--------------------------|---------------------------|
| Age stopped breastfeeding*                          |                          |                          |                           |
| 6 weeks or less                                     | 40.7%                    | (11/27**)                |                           |
| > 6 weeks to 4 months                               | 25.9%                    | (7/27)                   |                           |
| > 4 months to 6 months                              | 11.1%                    | (3/27)                   |                           |
| > 6 months                                          | 22.2%                    | (6/27)                   |                           |
| Age started formula feeds                           |                          |                          |                           |
| 6 weeks or less                                     | 77.2%                    | (44/57***)               |                           |
| > 6 weeks to 4 months                               | 5.3%                     | (3/57)                   |                           |
| > 4 months to 6 months                              | 8.8%                     | (5/57)                   |                           |
| > 6 months                                          | 8.8%                     | (5/57)                   |                           |
| Age when given a non – milk drink****<br>(weeks)    | Median 26 (IQR 20, 28)   |                          |                           |
| Age at which first given cow’s milk<br>(weeks)      | Median 44 (IQR 28, 36)   |                          |                           |
| Stopping breastfeeding and problems<br>with feeding | Initial<br>Questionnaire | 7 month<br>Questionnaire | 12 month<br>Questionnaire |
| Maternal opinion on how long they breastfed         |                          |                          |                           |
| Breastfed for as long as they intended              | 37.8% (14/37)            | 17.4% (4/23)             | 20.0% (4/20)              |
| Breastfed for longer than they intended             | 8.1% (3/37)              | 13.0% (3/23)             | 15.0% (3/20)              |
| Would have liked to breastfeed longer.              | 54.1% (20/37)            | 69.6% (16/23)            | 65.0% (13/20)             |
| Reasons for stopping breastfeeding                  |                          |                          |                           |
| Inadequate breastmilk supply                        | 30% (6/20)               | 13.0% (7/54)             | 5.0% (2/40)               |
| Problems expressing milk                            | 25% (5/20)               | 5.6% (3/54)              | 10.0% (4/40)              |
| Excessive time expressing milk                      | 25% (5/20)               | 1.9% (1/54)              | 5.0% (2/40)               |
| Baby losing weight                                  | 20% (4/20)               | 3.7% (2/54)              | 5.0% (2/40)               |
| Maternal medical problem                            | 15% (3/20)               | 3.7% (2/54)              | 2.5% (1/40)               |
| Lethargy                                            | 5% (1/20)                | 1.9% (1/54)              |                           |
| Weaning by choice                                   | n/a                      | 7.4% (4/54)              | 7.5% (3/40)               |
| Other                                               |                          | 5.6% (3/54)              | 10.0% (4/40)              |

Table 5: Stopping Breastfeeding

Footnote: \*including using expressed breastmilk and mixed feeding and/or were introduced to other types of milk feeds or drinks. \*\*this denominator is the number of women who had stopped breastfeeding by the data cut off date for data analysis. Some babies would still have been receiving breastmilk at the cut-off date for data analysis. Some would also have been still mixed feeding both breastmilk and formula \*\*\*Non-milk drinks included any drink other than milk including water (which would be fine) and juices which would not be recommended.

Just over half of the participants had problems associated with feeding after discharge from hospital (Table 3). The most common problems were lethargy or faltering growth. Three mothers mentioned their babies being readmitted to hospital with poor feeding. Less than



1  
2  
3 three-quarters, 72% (34/47) had the correct 'DS insert' in their Red book (the personal child  
4 health record that is given to every baby). The 'DS insert' contains the appropriate growth  
5 charts reflecting a tendency to 'normal', slower growth trajectory in this condition compared  
6 to non-trisomy babies (16).  
7  
8  
9  
10  
11

12  
13  
14 Over half of the mothers said that they would have liked to have breastfed for longer.  
15  
16 Reasons for stopping breastfeeding included inadequate breastmilk supply, issues with  
17 expressing breast milk and their babies having faltering growth. The quotes in Table 4  
18 illustrate the reasons mothers gave for stopping breastfeeding.  
19  
20  
21  
22  
23  
24  
25

26 Mothers were asked "What would have helped you breastfeed longer?" the answers included  
27 not introducing bottles as early, not needing to express, being at home and having more  
28 specific support. Quotes from the initial, 7-month and 12-month questionnaires in response to  
29 this question are given in Table 4. Some mothers also used this question to explain that they  
30 did breastfeed.  
31  
32  
33  
34  
35  
36  
37  
38  
39

#### 40 **Discussion:**

41  
42  
43

44 We have shown that exclusive breastfeeding amongst the babies with DS at six months is  
45 comparable to the general population (4% vs 1%). Apart from exclusive breastfeeding at six  
46 weeks when prevalence was similar (21% of babies with DS versus 23% in the general  
47 population), breastfeeding (exclusive or combination feeding) amongst the study participants  
48 was higher at all time points than levels reported in the general population (15). This was  
49 surprising and does not support the hypothesis that hypotonia and oro-motor issues associated  
50 with DS significantly alters ability to breastfeed. This is an important and encouraging  
51  
52  
53  
54  
55  
56  
57  
58  
59  
60

1  
2  
3 message for mothers and should inspire midwives and health professionals to support breast  
4 feeding. These findings suggest that the frequently heard mantra, that babies with DS  
5 probably will not breastfeed successfully, needs to be changed.  
6  
7  
8  
9

10  
11  
12 Formula was introduced very early at a median of five days with 77% having started by the  
13 age of six weeks. Overall, over half of the mothers were still breastfeeding beyond the age of  
14 six months (including babies who combination fed with breastmilk and infant formula) which  
15 is a very positive message for families. This is higher than the 34% at six months within the  
16 general population. Due to the wording of the questionnaire, it was not possible to distinguish  
17 between those who directly breastfed or those who gave expressed breastmilk, and this would  
18 be useful to include in future questionnaires.  
19  
20  
21  
22  
23  
24  
25  
26  
27  
28  
29

30  
31 Over half of FADES babies were admitted to SCBU, all being NG tube fed. In around 40%,  
32 issues with feeding were responsible for NG placement and for most of these participants,  
33 this was also the reason for SCBU admission. Almost 70% of the mothers said that having  
34 their baby in SCBU had affected their ability to feed the way they would have liked. This is  
35 possibly open to intervention as some admissions might be prevented with more  
36 specialised/tailored support on the postnatal wards. Some hospitals will only have one or two  
37 babies born a year with DS, possibly leading to automatic SCBU admissions with increased  
38 levels of anxiety around potential complications and associated conditions. In terms of oro-  
39 motor skill development, it is important that babies have the chance to feed orally early on.  
40 This is postulated to be important for the development of oral skills, tolerance of tastes and  
41 textures and is also important for social development (17). Most babies in our cohort required  
42 NG tube feeds for less than two weeks but a third also required feeds to be stopped altogether  
43 at some point and were put onto intravenous fluids.  
44  
45  
46  
47  
48  
49  
50  
51  
52  
53  
54  
55  
56  
57  
58  
59  
60

1  
2  
3  
4  
5 NG tube feeding was required for some babies due to dehydration, jaundice, polycythaemia  
6 and vomiting. Although classified as a 'medical' reason, inability to feed may have  
7  
8 contributed or caused these issues. Other 'medical' reasons, were are all standard causes for  
9  
10 any neonate to receive NG tube feeds including prematurity, ventilation or surgical abdomen.  
11  
12 Prevalence of NG tube feeding in the general population and in the typical DS population are  
13  
14 poorly reported. A third of those NG fed babies continued to receive exclusively expressed  
15  
16 breastmilk. Many of the babies were fed using expressed breastmilk either for NG tube feeds  
17  
18 or for top up feeds via alternative feeding methods including bottle.  
19  
20  
21  
22  
23  
24  
25

26 Lethargy was the most commonly reported problem with feeding after discharge with far  
27  
28 fewer citing poor latch than during the initial admission. Importantly 16% of the mothers said  
29  
30 that poor weight gain or weight loss was an issue. It is of concern that over a quarter of the  
31  
32 mothers reported that they were not given the correct 'DS insert' in their Personal Child  
33  
34 Health Record ('Red' book) (16). Healthy babies with DS gain weight more slowly than  
35  
36 other babies and it is important to account for this when assessing feeding and growth. If a  
37  
38 baby with DS is plotted on a standard growth chart they will appear to be failing to thrive and  
39  
40 a mother who is successfully feeding her baby, may be told that she needs to supplement  
41  
42 feeds, start formula feeds if she is breastfeeding or even that her baby needs admission to  
43  
44 hospital.  
45  
46  
47  
48  
49  
50

51 The higher levels of breastfeeding in the study compared to the general population may in  
52  
53 part, be due to selection bias. Mothers who have chosen to take part in the study may already  
54  
55 have a specific interest in infant feeding. In the UK, higher breastfeeding frequency is  
56  
57 described in mothers over 30 years of age (87%) (15) which may also explain the higher level  
58  
59  
60

1  
2  
3 of initial breastfeeding in FADES. The karyotype for the babies in the cohort was not  
4 requested which might be considered a weakness of the study. FADES potentially might  
5 include children with mosaic Down's syndrome who can be phenotypically milder although  
6 this is rare: Only one to three percent of DS children have Mosaicism (18).  
7  
8  
9  
10  
11  
12  
13  
14

15 Reasons for stopping breastfeeding were similar to the IFS 2010 (15) with inadequate  
16 breastmilk supply and faltering growth being common. However, a large proportion  
17 mentioned issues surrounding expressing milk. This highlights the need for mothers who are  
18 expressing to receive tailored support. Mothers were asked "What would have helped you  
19 breastfeed longer" the responses indicated that mothers understandably wanted 'normality',  
20 they wanted their babies to be well, to not require bottle or expressed milk and to be at home.  
21 Although it is not possible to change these factors for many, every effort should be made to  
22 listen to maternal wishes and assist where possible. Some mothers used this questionnaire to  
23 voice their frustration at alternative feeding methods being introduced 'too early' or 'against  
24 their wishes'.  
25  
26  
27  
28  
29  
30  
31  
32  
33  
34  
35  
36  
37  
38  
39

40 It is a strength of the study that the families recruited were representative of the general  
41 population of children with DS, with similar numbers of children having associated  
42 conditions including cardiac abnormalities as reported in other studies (19). The eligibility  
43 criteria were broad and did not exclude any medical conditions. A further strength is that the  
44 study was UK wide reducing selection bias. Those who could not speak English were  
45 excluded and this may have had altered feeding results with cultural differences in early  
46 feeding (20). Translating all study documentation however was not possible for the multiple  
47 languages now represented in UK population.  
48  
49  
50  
51  
52  
53  
54  
55  
56  
57  
58  
59  
60

1  
2  
3 These results raise some important questions and highlight potential opportunities for  
4 interventions in relation to feeding support for mothers of babies with DS. Any advice given  
5 to mothers on feeding a baby with DS based on this study should include the message that  
6 babies with DS can be exclusively breastfed or receive a combination of breast and formula  
7 feeds. However, some may need to include expressed breastmilk and alternative feeding  
8 methods. Providing mothers with access to tailored support and advice specifically around  
9 expressing should be included, as should information on NG tube feeding.  
10  
11  
12  
13  
14  
15  
16  
17  
18  
19  
20

### 21 **Conclusion:**

22 It is clear that some babies with DS can breastfeed exclusively for six months as per WHO  
23 guidelines. This may require significant perseverance from the mother and supportive  
24 professionals, as establishing breastfeeding can be challenging. Oro-motor difficulties and  
25 significant medical needs may underlie some challenges, but overall, mothers who wish to  
26 breastfeed should be encouraged and supported to do so as success is possible.  
27  
28  
29  
30  
31  
32  
33  
34  
35  
36  
37

38 Boxes – What is already known on this topic (bullet points)

- 39 • Babies with DS have anatomical and physiological features that may affect their  
40 ability to feed but this is phenotypically variable.
  - 41 • Babies with DS have associated medical conditions including congenital heart disease  
42 and gastro-intestinal abnormalities which may impact on early feeding.
  - 43 • Prevalence of NG Tube feeding in babies with DS has previously been reported as up  
44 to 40%.
- 45  
46  
47  
48  
49  
50  
51  
52  
53  
54  
55  
56

57 What this study adds  
58  
59  
60

- Breastfeeding prevalence amongst babies with DS are equivalent to the general population at 6 months.
- Babies with DS can receive exclusive breast-milk feeds for over 6 months.
- Early and extra post-natal support for breast feeding may be beneficial.
- At least half of babies with DS in this UK wide cohort study receive nasogastric feeds.

#### How this Study might affect research, practice or policy

- This study seeks to promote an increase in tailored feeding support for mother's of babies with DS.
- Key findings from this study may contribute to positive changes in breastfeeding advice and support for mother's of babies with DS.
- The high prevalence of babies receiving naso-gastric tube feeds warrants further research and potentially change in policy within neonatal units.

**Funding Statement:** This work was supported by the NIHR Bristol Biomedical Research Centre Nutrition Theme.

**Competing interests:** No competing interests

**Authors Contribution:** Georgina M.G. Williams was the chief investigator and PhD student, wrote the protocol, completed the data collection, data analysis and drafts of the manuscript. Sam Leary was the lead statistician on the study and PhD supervisor. She contributed to the protocol and study design, data analysis and draft manuscripts of the paper. Sofia Leadbetter provided the administrative support and coordination for the study, she was involved in participant recruitment and data collection. Stu Toms contributed to the study design, online questionnaires and managed the study database. Georgina Mortimer contributed to the data

collection and coordinates sample collection for the FADES study. Tim Scorrer recruited participants for the study and reviewed draft manuscripts of the paper. Kathleen Gillespie (PhD supervisor) contributed to the study protocol, study design and reviewed draft manuscripts of the article. Julian Hamilton Shield (PhD supervisor) contributed to the study protocol, study design and reviewed draft manuscripts of the articles.

**Data Sharing:** Data sets may only be available by individual request to the Corresponding Author.

## References

1. Kliegman, Robert M. (2011). "Down Syndrome and Other Abnormalities of Chromosome Number". Nelson textbook of pediatrics (19th ed.). Philadelphia: Saunders. pp. Chapter 76.2. ISBN 978-1-4377-0755-7
2. Kumin L, Von Hagel KC, Bahr DC. An effective oral motor intervention protocol for infants and toddlers with low muscle tone. *Infant Toddler Intervention*. 2001 Sep;11(3/4):181-200.
3. Kumin L, Bahr DC. Patterns of feeding, eating, and drinking in young children with Down syndrome with oral motor concerns. *Down Syndrome Quarterly*. 1999 Jun;4(2):1-8.
4. Lewis E, Kritzinger A. Parental experiences of feeding problems in their infants with Down syndrome. *Down Syndrome Research and Practice*. 2004 Jan 1;9(2):45-52.
5. World Health Organisation. 2009. "The optimal duration of exclusive breastfeeding: report of an expert consultation. 2002." World Health Organisation: Geneva.
6. Malcova H, Sumnik Z, Drevinek P, Venhacova J, Lebl J, Cinek O. Absence of breastfeeding is associated with the risk of type 1 diabetes: a case-control study in a population with rapidly increasing incidence. *European journal of pediatrics*. 2006 Feb;165(2):114-9.
7. Sollid LM. Breast milk against coeliac disease. *Gut*. 2002 Dec 1;51(6):767-8
8. Akobeng AK, Ramanan AV, Buchan I, Heller RF. Effect of breast feeding on risk of coeliac disease: a systematic review and meta-analysis of observational studies. *Archives of disease in childhood*. 2006 Jan 1;91(1):39-43.
9. Bowatte G, Tham R, Allen KJ, Tan DJ, Lau MX, Dai X, Lodge CJ. Breastfeeding and childhood acute otitis media: a systematic review and meta-analysis. *Acta Paediatrica*. 2015 Dec;104:85-95
10. Bloemers BL, Broers CJ, Bont L, Weijerman ME, Gemke RJ, van Furth AM. Increased risk of respiratory tract infections in children with Down syndrome: the consequence of an altered immune system. *Microbes and infection*. 2010 Oct 1;12(11):799-808.
11. CDSS. 2018. "The Children with Downs Syndrome Study." accessed 12.11.2018. <https://www.cdss.org.uk>.
12. LonDownS Consortium. [www.ucl.ac.uk/london-down-syndrome-consortium](http://www.ucl.ac.uk/london-down-syndrome-consortium)

13. Cunningham, Cliff. 1996. "Families of children with Down syndrome." *Down Syndrome Research and Practice* 4 (3):87-95.
14. Carr, Janet. 1988. "Six weeks to twenty-one years old: A longitudinal study of children with Down's syndrome and their families." *Journal of child Psychology and Psychiatry* 29 (4):407-431.
15. McAndrew F, Thompson J, Fellows L, Large A, Speed M, Renfrew MJ. Infant feeding survey 2010. Leeds: health and social care information Centre. 2012 Nov 20;2(1).
16. DSMIG. 2019b. "Personal Child Health Record, Down Syndrome Medical Interest Group." accessed 04.07.2019. <https://www.dsmig.org.uk/information-resources/personal-child-health-record-pchr/>.
17. Mason SJ, Harris G, Blissett J. Tube feeding in infancy: implications for the development of normal eating and drinking skills. *Dysphagia*. 2005 Mar;20(1):46-61.
18. Devlin L, Morrison PJ. Mosaic Down's syndrome prevalence in a complete population study. *Archives of disease in childhood*. 2004 Dec 1;89(12):1177-8.
19. Roizen, Nancy J, and David Patterson. 2003. "Down's syndrome." *The Lancet* 361 (9365):1281-1289.
20. Griffiths LJ, Tate AR, Dezateux C. The contribution of parental and community ethnicity to breastfeeding practices: evidence from the Millennium Cohort Study. *International Journal of Epidemiology*. 2005 Dec 1;34(6):1378-86



# BMJ Paediatrics Open

## Establishing breast feeding in Infants with Down syndrome: the FADES cohort experience

|                               |                                                                                                                                                                                                                                                                                                                                                                                                                                                                                                                                                                                                                |
|-------------------------------|----------------------------------------------------------------------------------------------------------------------------------------------------------------------------------------------------------------------------------------------------------------------------------------------------------------------------------------------------------------------------------------------------------------------------------------------------------------------------------------------------------------------------------------------------------------------------------------------------------------|
| Journal:                      | <i>BMJ Paediatrics Open</i>                                                                                                                                                                                                                                                                                                                                                                                                                                                                                                                                                                                    |
| Manuscript ID                 | bmjpo-2022-001547.R1                                                                                                                                                                                                                                                                                                                                                                                                                                                                                                                                                                                           |
| Article Type:                 | Original research                                                                                                                                                                                                                                                                                                                                                                                                                                                                                                                                                                                              |
| Date Submitted by the Author: | 14-Sep-2022                                                                                                                                                                                                                                                                                                                                                                                                                                                                                                                                                                                                    |
| Complete List of Authors:     | Williams, Georgina; NIHR Bristol Biomedical Research Centre; University of Bristol, Translational Health Sciences<br>Leary, Sam; NIHR Bristol Biomedical Research Centre<br>Leadbetter, Sofia; NIHR Bristol Biomedical Research Centre<br>Toms, Stu; NIHR Bristol Biomedical Research Centre<br>Mortimer, Georgina ; University of Bristol, Translational Health Sciences<br>Scorrer, Tim; Portsmouth Hospitals University NHS Trust, Neonatology<br>Gillespie, Kathleen; University of Bristol, Translational Health Sciences<br>Shield, Julian; University of Bristol, Biomedical Research Unit in Nutrition |
| Keywords:                     | Epidemiology, Syndrome                                                                                                                                                                                                                                                                                                                                                                                                                                                                                                                                                                                         |
|                               |                                                                                                                                                                                                                                                                                                                                                                                                                                                                                                                                                                                                                |

SCHOLARONE™  
Manuscripts



I, the Submitting Author has the right to grant and does grant on behalf of all authors of the Work (as defined in the below author licence), an exclusive licence and/or a non-exclusive licence for contributions from authors who are: i) UK Crown employees; ii) where BMJ has agreed a CC-BY licence shall apply, and/or iii) in accordance with the terms applicable for US Federal Government officers or employees acting as part of their official duties; on a worldwide, perpetual, irrevocable, royalty-free basis to BMJ Publishing Group Ltd ("BMJ") its licensees and where the relevant Journal is co-owned by BMJ to the co-owners of the Journal, to publish the Work in this journal and any other BMJ products and to exploit all rights, as set out in our [licence](#).

The Submitting Author accepts and understands that any supply made under these terms is made by BMJ to the Submitting Author unless you are acting as an employee on behalf of your employer or a postgraduate student of an affiliated institution which is paying any applicable article publishing charge ("APC") for Open Access articles. Where the Submitting Author wishes to make the Work available on an Open Access basis (and intends to pay the relevant APC), the terms of reuse of such Open Access shall be governed by a Creative Commons licence – details of these licences and which [Creative Commons](#) licence will apply to this Work are set out in our licence referred to above.

Other than as permitted in any relevant BMJ Author's Self Archiving Policies, I confirm this Work has not been accepted for publication elsewhere, is not being considered for publication elsewhere and does not duplicate material already published. I confirm all authors consent to publication of this Work and authorise the granting of this licence.

1  
2  
3 **1 Title Page:**  
4

5 **2 Establishing breast feeding in infants with Down syndrome: the**  
6  
7  
8 **3 FADES cohort experience**  
9

10  
11 4 Georgina M.G. Williams<sup>1,2,3,4</sup>, Sam Leary<sup>1</sup>, Sofia Leadbetter<sup>1</sup>, Stu Toms<sup>1</sup>, Georgina  
12  
13 5 Mortimer<sup>2</sup>, Tim Scorrer<sup>5</sup>, Kathleen Gillespie<sup>2</sup>, Julian Hamilton Shield<sup>1,2,3</sup>  
14  
15

16  
17  
18 7 Affiliations:  
19

20 8 <sup>1</sup>NIHR Bristol Biomedical Research Centre Nutrition Theme, University of Bristol, Bristol, England  
21

22 9 <sup>2</sup>Translational Health Sciences, University of Bristol, Bristol, England  
23

24 10 <sup>3</sup>Bristol Royal Hospital for Children, University Hospitals Bristol and Weston NHS Foundation Trust, Bristol,  
25  
26 11 England

27  
28 12 <sup>4</sup>Noah's Ark Children's Hospital for Wales, Cardiff and Vale University Health Board,  
29

30 13 <sup>5</sup>Portsmouth Hospitals University NHS Trust. Portsmouth, England.  
31  
32 14

33  
34 15 Corresponding Author:  
35

36 16 Dr Georgina Williams  
37

38 17 NIHR Biomedical Research Centre Bristol Nutrition Theme  
39

40 18 Level 3,  
41

42  
43 19 University Hospitals Bristol Education & Research Centre  
44

45 20 Upper Maudlin Street, Bristol  
46

47 21 BS2 8AE  
48  
49 22

50  
51  
52 23 Funding Source: NIHR Bristol Biomedical Research Centre Nutrition Theme, University of  
53  
54 24 Bristol, Bristol, England  
55

56  
57 25

58  
59 26 Word Count: 2753 words  
60

1  
2  
3 27  
45 28 **Abstract:**

6  
7  
8 29 Objective: To describe breast feeding prevalence, and maternal experience in infants with  
9  
10 30 Trisomy 21.

11  
12 31 Design: Longitudinal cohort study

13  
14 32 Setting: Participants from UK recruited through websites, social media and local  
15  
16 33 collaborators: neonatologists, community paediatricians and research nurses.

17  
18 34 Subjects: Infants under the age of 8 months with Down syndrome (DS) recruited to the  
19  
20 35 FADES (Feeding and Autoimmunity in Down Syndrome Evaluation Study) between the 1<sup>st</sup>  
21  
22 36 September 2014 to 31<sup>st</sup> August 2017. Seventy participants: median age 20 weeks  
23  
24 37 (Interquartile range (IQR) 13, 29 weeks) at initial questionnaire.

25  
26 38 Main outcome measure: Breastfeeding prevalence at 6 weeks and 6 months amongst infants  
27  
28 39 with DS.

29  
30 40 Results: The prevalence of exclusive breastfeeding amongst study participants was similar to  
31  
32 41 the general population (13/61 21% vs 23% at 6 weeks, 2/54 4% vs 1% at 6 months).

33  
34 42 However, the prevalence of breastfeeding (exclusive or combination feeding) amongst the  
35  
36 43 study participants was higher than the general population (39/61 64% vs 55% at 6 weeks,  
37  
38 44 32/59 54% vs 34% at 6 months).

39  
40 45 Conclusion: Although there may be challenges in establishing breastfeeding in infants with  
41  
42 46 DS, our data suggest that exclusive breastfeeding is possible for some, and the prevalence of  
43  
44 47 breastfeeding is comparable to the prevalence in the general population.

45  
46 48 Trial Registration: ISRCTN 12415856  
47  
48 49

49  
50 51 **Keywords: Down Syndrome, Trisomy 21, Feeding, Breast-feeding,**  
51  
52 52

## 53 **Background**

54

55 Down syndrome (DS) is caused by trisomy of chromosome 21. DS is usually diagnosed  
56 antenatally or in the first few days of life by recognition of salient features (1). A number of  
57 associated conditions including congenital heart disease and gastrointestinal complications  
58 can cause additional challenges during the neonatal period.

59

60 Current World Health Organisation (WHO) recommendations are that infants should be  
61 exclusively breastfed until 6 months (5), this is based on the health benefits for mother and  
62 baby. Prolonged exclusive breastfeeding is possibly protective against some autoimmune  
63 conditions including type 1 diabetes and coeliac disease for which children with DS are at  
64 increased risk (6,7,8). Furthermore, there is evidence that breastfeeding exclusively or  
65 combined feeding to a lesser but significant extent, enhances immunity and is protective  
66 against otitis media and respiratory tract infections (9) both being more prevalent in children  
67 with DS (10).

68

69 Infants with DS may have oral, anatomical and physiological abnormalities affecting their  
70 ability to feed normally: as with other features of DS there is phenotypic variability. To  
71 breastfeed effectively, a tight oral/nipple seal needs to be induced with the tongue making a  
72 groove and the lips sealing around the nipple. For a baby with DS, the flattened shape of the  
73 tongue and low tone in the oral structures means that establishing breastfeeding may be  
74 challenging. (2,3). Lewis et al reported that 40% of DS infants had been naso-gastric (NG)  
75 tube fed during the neonatal period illustrating some of the issues with feeding (4).

76

1  
2  
3 77 Many countries have registers which provide data on people with DS. These have facilitated  
4  
5 78 retrospective studies providing statistics on for example: birth and death rates and congenital  
6  
7 79 anomalies. However longitudinal birth cohort studies of infants with DS in the UK are rare  
8  
9  
10 80 (11,12,13,14). The FADES (Feeding and Autoimmunity in Down Syndrome Evaluation  
11  
12 81 Study) was established to investigate early feeding and the development of autoimmunity.  
13  
14 82 Medical and detailed feeding data are collected by mothers from birth and includes both  
15  
16 83 feeding in the hospital settings and at home. A study hypothesis is that infants with DS have  
17  
18 84 difficulties with establishing breast feeding and are therefore introduced to formula feeds at  
19  
20 85 an earlier age. The aim of this paper is to describe breastfeeding prevalence and experiences  
21  
22 86 among infants with DS and their mothers, in the first six months of life. This paper describes  
23  
24 87 findings from the analysis of the feeding data collected between September 2014 and August  
25  
26 88 2017, to explore this and compare to breastfeeding prevalence in the general population.  
27  
28  
29  
30  
31  
32

### 33 **Methods:**

34  
35 91  
36  
37 92 FADES is an ongoing UK wide study recruiting infants with DS antenatally or in the first  
38  
39 93 eight months of life. Exclusion criteria are infants born with a child protection plan, fostered  
40  
41 94 or adopted, >8 months or parents do not speak English. Participants are recruited either by  
42  
43 95 health professionals including neonatologists, community paediatricians and research nurses  
44  
45 96 or via web recruitment through the Downs Syndrome Association, Downs Syndrome  
46  
47 97 Scotland, and other websites and social media [https://www.bristolbrc.nihr.ac.uk/our-](https://www.bristolbrc.nihr.ac.uk/our-research/nutrition-diet-and-lifestyle/childhood/fades-study-2/)  
48  
49 98 [research/nutrition-diet-and-lifestyle/childhood/fades-study-2/](https://www.bristolbrc.nihr.ac.uk/our-research/nutrition-diet-and-lifestyle/childhood/fades-study-2/). A combined feeding and  
50  
51 99 medical questionnaire is completed by families at recruitment (initial questionnaire), at six to  
52  
53 100 eight months of life (7-month questionnaire) and then at 12 months (12-month questionnaire).  
54  
55  
56 101 Feeding questions are based on those from the Infant Feeding Survey (IFS) 2010 (15),  
57  
58  
59  
60

1  
2  
3 102 medical questions are related to conditions associated with DS, hospital admissions and  
4  
5 103 antibiotic usage. Mothers are able to provide free text answers to some questions and quotes  
6  
7  
8 104 from these have been used to illustrate key points. A full qualitative study and analysis has  
9  
10 105 not been completed as part of this feasibility study. This paper presents data collected in the  
11  
12 106 first three years of recruitment from 1<sup>st</sup> September 2014 to 31<sup>st</sup> August 2017 when the  
13  
14 107 feasibility assessment was conducted.  
15  
16  
17 108

19 109 **Statistical Analysis:** As a feasibility study, analysis of the questionnaires is descriptive as  
20  
21 110 there is not enough power to statistically test for associations. Frequencies were derived and  
22  
23 111 presented as percentages for categorical variables. For continuous data, means and standard  
24  
25 112 deviations (SDs) were presented for data that were approximately normal, and medians and  
26  
27 113 interquartile ranges (IQRs) for non-normal data. Analysis used STATA vs. 15. Comparisons  
28  
29 114 are made with the general population from the results reported by the IFS 2010 (15).  
30  
31  
32  
33 115

35 116 **Public involvement:** The study design including recruitment and data collection methods  
36  
37 117 were established following discussion with and involvement of the Downs Syndrome  
38  
39 118 Association. Local members (all of whom were parents of a child with DS) advised on the  
40  
41 119 wording and feasibility of the feeding and medical questionnaires.  
42  
43  
44  
45 120

46  
47 121 Ethics approval for FADES was given by the National Research Ethics Service (NRES)  
48  
49 122 Committee South West – Central Bristol 23<sup>rd</sup> April 2014 14/SW/0030 and it is an NIHR  
50  
51 123 Portfolio study.  
52  
53  
54 124  
55  
56 125  
57  
58 126  
59  
60

1  
2  
3 127 **Results:**  
4

5 128  
6

7  
8 129 Seventy participants were recruited between the 1<sup>st</sup> September 2014 and the 31<sup>st</sup> August  
9

10 130 2017. 61 out of the 70 participants (87%) completed the initial feeding and medical  
11

12 131 questionnaire at a median age of 20 weeks (IQR 13, 29 weeks). Of these, approximately a  
13

14 132 quarter (n=15) were diagnosed antenatally with DS. Table 1 summarises maternal  
15

16 133 characteristics and birth details. Over half were born by normal vaginal delivery: median  
17  
18

19 134 gestation, 38 weeks (IQR 37, 39 weeks), mean birthweight of 3kg (SD 0.5kg). Most infants  
20

21 135 were born in hospital units, three were home deliveries. Median hospital stay after birth was  
22

23 136 five days (IQR 3, 9 days).  
24  
25

26 137  
27

28 138  
29

30 139  
31

32 140  
33

34 141  
35

36 142  
37

38 143  
39

40 144  
41

42 145  
43

44 146  
45

46 147  
47

48 148  
49

50 149  
51

52 150  
53

54 151  
55  
56  
57  
58  
59  
60



| Background Characteristics                                       |                                   |               |
|------------------------------------------------------------------|-----------------------------------|---------------|
| Maternal age (years) at time of completing initial questionnaire | 20 to 24                          | 5/61 (8.2%)   |
|                                                                  | 25 to 29                          | 6/61 (9.8%)   |
|                                                                  | 30 to 34                          | 15/61 (24.6%) |
|                                                                  | 35 to 39                          | 23/61 (37.7%) |
|                                                                  | 40 or over                        | 12/61 (19.7%) |
| Mother's marital status                                          | Living together                   | 17/61 (27.9%) |
|                                                                  | Married or in a civil partnership | 40/61 (65.6%) |
|                                                                  | Single                            | 3/61 (4.9%)   |
|                                                                  | Widowed, divorced, or separated   | 1/61 (1.6%)   |
| Mother's ethnic group                                            | Other                             | 2/61 (3.3%)   |
|                                                                  | White British                     | 53/61 (86.9%) |
|                                                                  | White Irish                       | 3/61 (4.9%)   |
|                                                                  | White Other                       | 3/61 (4.9%)   |
| Birth History                                                    |                                   |               |
| First baby                                                       |                                   | 19/61 (31.2%) |
| Prenatal diagnosis of DS                                         |                                   | 15/61 (24.6%) |
| Twin Birth                                                       |                                   | 2/61 (3.3%)   |
| Type of delivery                                                 | Normal Vaginal delivery           | 38/60 (63.3%) |
|                                                                  | C-Section                         | 17/60 (28.3%) |
|                                                                  | Forceps                           | 2/60 (3.3%)   |
|                                                                  | Ventouse                          | 3/60 (5.0%)   |
| Gestation (weeks)                                                | Median 38 (IQR 37, 39)            |               |
| Pre-term 32-37 weeks                                             |                                   | 13/61 (21.3%) |
| Birthweight (kg)                                                 | Mean 3.0 (0.5 SD)                 |               |
| Location of birth                                                | At home                           | 3/59 (5.0%)   |
|                                                                  | In hospital (consultant led)      | 29/59 (49.2%) |
|                                                                  | In hospital (midwife led)         | 25/59 (42.4%) |
|                                                                  | Birth centre (midwife led)        | 2/59 (3.4%)   |
| Length of initial hospital stay (hours)                          | Median 120 (IQR 72, 216)          |               |

152

153 Table 1: Maternal characteristics and birth details

154 Footnote: DS (Down syndrome), IQR (inter quartile range), SD (standard deviation), C-section (Caesarean  
155 Section)

156

157 Over half (34/61, 56%) were admitted into a special care baby unit (SCBU) with almost a  
158 third of these (10/34, 29%) primarily due to poor feeding. Half of the infants for whom data  
159 were available, required NG tube feeding as shown in Table 2. All admitted to SCBU, were  
160 NG tube fed. Of the 31 infants who were fed via NG tube, 12/31 (40%), primarily required

1  
2  
3 161 NG tube feeds in SCBU due to feeding issues, the remainder due to medical co-morbidities  
4  
5 162 (37% with multiple medical indications). NG tube feeds were mostly expressed breastmilk  
6  
7  
8 163 or a mixture of expressed milk and infant formula. NG tube feeds were required in 19/31  
9  
10 164 (60%) participants for less than two weeks.  
11

12 165

13  
14 166

15  
16 167

17  
18 168

19  
20 169

21  
22 170

23  
24 171

25  
26 172

27  
28 173

29  
30 174

31  
32 175

33  
34 176

35  
36 177

37  
38 178

39  
40 179

41  
42 180

43  
44 181

45  
46 182

47  
48 183

49  
50 184

51  
52 185

53  
54  
55  
56  
57  
58  
59  
60

| SCBU Admission                                                                 |                                          |                     |
|--------------------------------------------------------------------------------|------------------------------------------|---------------------|
| Admitted to SCBU                                                               |                                          | 34/61 (55.7%)       |
| Admitted to SCBU due to problems with feeding                                  |                                          | 10/34 (29.4%)       |
| Admitted to SCBU for any other reason*                                         |                                          | 24/34 (70.6%)       |
| Hypoxia / respiratory distress / PPHN                                          |                                          | 17/34 (50.0%)       |
| Jaundice                                                                       |                                          | 7/34 (20.6%)        |
| Cardiac / cardiac monitoring                                                   |                                          | 4/34 (11.8%)        |
| Infection                                                                      |                                          | 4/34 (11.8%)        |
| Prematurity                                                                    |                                          | 3/34 (8.8%)         |
| Polycythaemia                                                                  |                                          | 2/34 (5.9%)         |
| Other                                                                          |                                          | 7/34 (20.6%)        |
| Length of SCBU stay (weeks)                                                    |                                          | Median 2 (IQR 2, 4) |
| Feeding in SCBU and NG tube Feeds                                              |                                          |                     |
| SCBU admission affected ability of mother to feed baby as she would have liked |                                          | 23/34 (67.7 %)      |
| Shown how to express milk in SCBU                                              |                                          | 29/34 (85.3 %)      |
| Felt supported to express milk in SCBU                                         |                                          | 27/30 (90.0 %)      |
| Had NG tube feeds                                                              |                                          | 31/31* (100 %)      |
| Required NG tube feeds due to problems with feeding                            |                                          | 12/31 (38.7 %)      |
| Medical reason for NG tube feeds**                                             | Prematurity                              | 2/19 (10.5 %)       |
|                                                                                | Dehydration / hydration                  | 2/19 (10.5 %)       |
|                                                                                | Ventilation                              | 2/19 (10.5 %)       |
|                                                                                | Respiratory problems                     | 8/19 (42.1 %)       |
|                                                                                | Jaundice / polycythaemia                 | 4/19 (21.1 %)       |
|                                                                                | Vomiting or surgical abdomen             | 4/19 (21.1 %)       |
| Length of time NG tube fed                                                     | < 3 days                                 | 5/31 (16.1 %)       |
|                                                                                | > 3 to 7 days                            | 6/31 (19.4 %)       |
|                                                                                | > 1 to 2 weeks                           | 8/31 (25.8 %)       |
|                                                                                | > 2 to 4 weeks                           | 6/31 (19.4 %)       |
|                                                                                | > 1 to 2 months                          | 5/31 (16.1 %)       |
|                                                                                | > 2months                                | 1/31 (3.2 %)        |
| Type of NG tube feeds given                                                    | Only expressed breast milk               | 10/31 (32.3 %)      |
|                                                                                | Only infant formula                      | 2/31 (6.5 %)        |
|                                                                                | Expressed breast milk and infant formula | 19/31 (61.3 %)      |
| Feeds stopped and IV fluids given                                              |                                          | 11/34 (32.4 %)      |
| Length of time on IV fluids                                                    | < 3 days                                 | 2/9 (22.2 %)        |
|                                                                                | > 3 to 7 days                            | 4/9 (44.4 %)        |
|                                                                                | > 7 days to 1 month                      | 3/9 (33.3 %)        |

186

187 Table 2: Feeding in SCBU (special care baby unit) and NG (nasogastric) tube feeds

188

189 Footnote: IV fluids (Intra- venous fluids), PPHN (persistent pulmonary hypertension of the newborn),

190 \*Due to an issue with branching of the questions at least 31 infants were NG tube fed but there may have been

191 more. Where they were branched away, people have been counted as missing, so the denominator is 31.

192 \*\*Coded from open response

1  
2  
3 193 Of the mothers receiving an antenatal diagnosis for their baby, 13/15 (87%) were told about  
4  
5 194 problems relating to feeding but only three (3/15, (20%)) received any specific antenatal  
6  
7 195 advice about breastfeeding a baby with DS. Most mothers initially breastfed their baby, with  
8  
9  
10 196 47/60 (78%) having skin to skin contact within 24 hours of birth (Table 3). Feeding problems  
11  
12 197 that were experienced in the hospital or birthing centre by mothers, included those commonly  
13  
14 198 associated with infants with DS such as poor latch and lethargy. Although hypotonia is one of  
15  
16 199 the explanations frequently given as a cause for feeding difficulties, only one parent  
17  
18 200 described this feature. Mothers provided responses to an open question regarding feeding  
19  
20 201 their baby in the hospital, birth centre or unit as illustrated in the quotes in Table 4.  
21  
22  
23  
24 202  
25  
26 203  
27  
28 204  
29  
30 205  
31  
32 206  
33  
34 207  
35  
36 208  
37  
38 209  
39  
40 210  
41  
42 211  
43  
44 212  
45  
46 213  
47  
48 214  
49  
50 215  
51  
52 216  
53  
54 217  
55  
56  
57  
58  
59  
60

| First Feeds                                                                        |                                |                  |
|------------------------------------------------------------------------------------|--------------------------------|------------------|
| Ever breastfed or received expressed breast milk                                   |                                | 55/61 (90.2 %)   |
| Had skin to skin contact within 24hrs of birth                                     |                                | 47/60 (78.3 %)   |
| Maternal health problems after birth that affected feeding                         |                                | 4/61 (6.6 %)     |
| Received help with breastfeeding within first few days                             |                                | 40/60 (66.7 %)   |
| How soon after birth was baby put to the breast                                    | within a few minutes           | 14/55 (25.5 %)   |
|                                                                                    | <30 min                        | 17/55 (30.9 %)   |
|                                                                                    | 30 min to 1 hr                 | 9/55 (16.4 %)    |
|                                                                                    | >1 hr to 8 hrs                 | 3/55 (5.5 %)     |
|                                                                                    | >8 hrs to 24 hrs               | 3/55 (5.5 %)     |
|                                                                                    | > 24 hrs later                 | 9/55 (16.4 %)    |
| Experienced problems when feeding their baby in the hospital, birth centre or unit |                                | 45/58* (77.5 %)  |
| Common problems with feeding**                                                     | Poor latch                     | 20/45 (44.4 %)   |
|                                                                                    | Medical issue                  | 14/45 (31.1 %)   |
|                                                                                    | Jaundice                       | 14/45 (31.1 %)   |
|                                                                                    | Tired / lethargic              | 13/45 (28.9 %)   |
|                                                                                    | Maternal reason                | 4/45 (8.9 %)     |
|                                                                                    | Tongue size/ position          | 3/45 (6.7 %)     |
|                                                                                    | Low tone                       | 1/45 (2.2 %)     |
| Reported that they received enough help with feeding in hospital / birth centre    |                                | 48/58 (82.8 %)   |
| General Feeding and feeding after discharge from hospital / birth centre           |                                |                  |
| Problems with feeding baby after discharge from hospital / birth centre            |                                | 30/56 (53.6%)    |
| Problems with feeding after discharge**                                            |                                |                  |
|                                                                                    | Lethargy                       | 13/61 (21.3%)    |
|                                                                                    | Poor weight gain / weight loss | 10/61 (16.4%)    |
|                                                                                    | Low tone                       | 1/61 (1.6%)      |
|                                                                                    | Latch                          | 5/61 (8.2%)      |
|                                                                                    | Medical                        | 3/61 (4.9%)      |
|                                                                                    | Jaundice                       | 3/61 (4.9%)      |
|                                                                                    | Reflux                         | 3/61 (4.9%)      |
| Received help or information with feeding problems after discharge                 |                                | 27/32*** (84.4%) |

218

219 Table 3: First feeds and feeding after discharge

220 Footnote:\* Three infants were home births \*\* These problems were coded from open responses

221 \*\*\*This denominator comes from the 30 participants who experienced problems with feeding after discharge

222 from hospital and two who experienced problems with feeding after their home birth.

223

224

225

226

227

228

229

230

231

232

233

234

235

236

237

238

239

240

241

|                                                            |                                                                                                                                                                                                                                                                                                                                                                                                                                                                                                                                                                                                                                                                                                                                                                                                                                                                                                                                                                                     |
|------------------------------------------------------------|-------------------------------------------------------------------------------------------------------------------------------------------------------------------------------------------------------------------------------------------------------------------------------------------------------------------------------------------------------------------------------------------------------------------------------------------------------------------------------------------------------------------------------------------------------------------------------------------------------------------------------------------------------------------------------------------------------------------------------------------------------------------------------------------------------------------------------------------------------------------------------------------------------------------------------------------------------------------------------------|
| Question from initial questionnaire                        | <b>‘Were there any problems feeding your baby while you were in the hospital, birth centre or unit? What problems were there?’</b>                                                                                                                                                                                                                                                                                                                                                                                                                                                                                                                                                                                                                                                                                                                                                                                                                                                  |
| Quotes                                                     | <p><i>“X would not take anything from the breast and was very sleepy so had an NG tube put in.”</i></p> <p><i>“A feeding tube was inserted straight away, which prevented me from breast feeding. It also prevented her from becoming hungry enough to feed from me”</i></p> <p><i>“baby continually pushing tongue out and could not latch on. Decided to try the bottle which she took immediately so did not try breast again and was not questioned by staff”</i></p>                                                                                                                                                                                                                                                                                                                                                                                                                                                                                                           |
| Question from Initial, 7 month and 12 month questionnaire  | <b>‘Have you stopped breastfeeding (no longer give your baby any expressed milk or put your baby to your breast)? What were your reasons for stopping?’</b>                                                                                                                                                                                                                                                                                                                                                                                                                                                                                                                                                                                                                                                                                                                                                                                                                         |
| Quotes                                                     | <p><i>“Significant weight loss in early days, poor latch, inadequate milk being taken by baby, readmission to hospital for tube feeding, introduction of bottle feeding in hospital, milk supply subsequently drying up due to baby being put on bottle and use of pumps further made milk supply deteriorate.”</i></p> <p><i>“Baby fell asleep too much at the breast to feed properly. It was too time consuming and stressful to keep expressing.”</i></p>                                                                                                                                                                                                                                                                                                                                                                                                                                                                                                                       |
| Question from initial, 7-month and 12-month questionnaires | <b>“What would have helped you breastfeed longer?”</b>                                                                                                                                                                                                                                                                                                                                                                                                                                                                                                                                                                                                                                                                                                                                                                                                                                                                                                                              |
| Quotes                                                     | <p><i>“Knowing as I do now that it's common to have feeding problems with Down syndrome. More specific breastfeeding support.” (from initial questionnaire)</i></p> <p><i>“I feel I was forced to give Child’s name a bottle when she was only a day old as the midwife was unwilling to entertain my concerns about the bottle meaning that she would never take the breast. I had wanted to give the milk by syringe or cup to give her a chance to keep trying the breast, but I was shot down and ridiculed.” (from 7-month questionnaire)</i></p> <p><i>“I just became too sick, unwell but at the same time I fed longer than I thought I would. Thanks to the support I received.” (from 12-month questionnaire)</i></p> <p><i>“She lost 6% of her birth weight by day 9 and the NICU home midwife suggested we move onto top up. I think that was the pinch point. If I had said no, let’s try harder to feed from the breast it might have established itself. But</i></p> |

*she had just been discharged from hospital and I was so reluctant to go back. You really have the threat of readmission hanging over you... I would have loved to feed her myself. It is my biggest sadness but there were too many other variables at play. I am pleased I was able to exclusively breast feed her though for well over 4 months.” (from 12-month questionnaire)*

Table 4: Quotes from free text boxes in initial, 7 month and 12 month questionnaire

Of the 61 mother/baby dyads, 39 (64%) continued some breastfeeding for over six weeks (Table 5) (including infants who received mixed infant formula and breastmilk feeds). Over the age of six months, this decreased to 32 (32/59 (54%)) still breastfeeding in part. These percentages are higher than in the general population, levels reported in the Infant Feeding Survey (IFS) 2010 (55% and 34% respectively) (15). The prevalence of exclusive breastfeeding in the study population at six weeks was 13/61 (21%) compared to 23% in the general population in the IFS 2010 (15). By six months of age, two (2/54 (4%)) participants were exclusively breast fed. This compares to 1% of general population. Using data from the initial and 7-month questionnaires, the median age at which some formula milk was introduced in the whole cohort was five days (IQR 1, 21 days). Formula feeds were introduced by 52% of mothers within a week in the IFS 2010 and 75% by 6 weeks.

| Types of feeds / Stopping breastfeeding          |                        |                       |                        |
|--------------------------------------------------|------------------------|-----------------------|------------------------|
| Age stopped breastfeeding*                       |                        |                       |                        |
| 6 weeks or less                                  | 11/27** (40.7%)        |                       |                        |
| > 6 weeks to 4 months                            | 7/27 (25.9%)           |                       |                        |
| > 4 months to 6 months                           | 3/27 (11.1%)           |                       |                        |
| > 6 months                                       | 6/27 (22.2%)           |                       |                        |
| Age started formula feeds                        |                        |                       |                        |
| 6 weeks or less                                  | 44/57*** (77.2%)       |                       |                        |
| > 6 weeks to 4 months                            | 3/57 (5.3%)            |                       |                        |
| > 4 months to 6 months                           | 5/57 (8.8%)            |                       |                        |
| > 6 months                                       | 5/57 (8.8%)            |                       |                        |
| Age when given a non – milk drink**** (weeks)    | Median 26 (IQR 20, 28) |                       |                        |
| Age at which first given cow’s milk (weeks)      | Median 44 (IQR 28, 48) |                       |                        |
| Stopping breastfeeding and problems with feeding | Initial Questionnaire  | 7 month Questionnaire | 12 month Questionnaire |
| Maternal opinion on how long they breastfed      |                        |                       |                        |
| Breastfed for as long as they intended           | 14/37(37.8%)           | 4/23 (17.4%)          | 4/20 (20.0%)           |
| Breastfed for longer than they intended          | 3/37 (8.1%)            | 3/23 (13.0%)          | 3/20 (15.0%)           |
| Would have liked to breastfeed longer.           | 20/37 (54.1%)          | 16/23 (69.6%)         | 13/20 (65.0%)          |
| Reasons for stopping breastfeeding               |                        |                       |                        |
| Inadequate breastmilk supply                     | 6/20 (30%)             | 7/54 (13.0%)          | 2/40 (5.0%)            |
| Problems expressing milk                         | 5/20 (25%)             | 3/54 (5.6%)           | 4/40 (10.0%)           |
| Excessive time expressing milk                   | 5/20 (25%)             | 1/54 (1.9%)           | 2/40 (5.0%)            |
| Baby losing weight                               | 4/20 (20%)             | 2/54 (3.7%)           | 2/40 (5.0%)            |
| Maternal medical problem                         | 3/20 (15%)             | 2/54 (3.7%)           | 1/40 (2.5%)            |
| Lethargy                                         | 1/20 (5%)              | 1/54 (1.9%)           |                        |
| Weaning by choice                                | n/a                    | 4/54 (7.4%)           | 3/40 (7.5%)            |
| Other                                            |                        | 3/54 (5.6%)           | 4/40 (10.0%)           |

Table 5: Stopping Breastfeeding

Footnote: \*including using expressed breastmilk and mixed feeding and/or were introduced to other types of milk feeds or drinks. \*\*this denominator is the number of women who had stopped breastfeeding by the data cut off date for data analysis. Some infants would still have been receiving breastmilk at the cut-off date for data analysis. Some would also have been still mixed feeding both breastmilk and formula \*\*\*Non-milk drinks included any drink other than milk including water (which would be fine) and juices which would not be recommended.

Just over half of the participants had problems associated with feeding after discharge from hospital (Table 3). The most common problems were lethargy or faltering growth. Three mothers mentioned their infants being readmitted to hospital with poor feeding. Less than



1  
2  
3 270 three-quarters, 34/47 (72%) had the correct 'DS insert' in their Red book (the personal child  
4  
5 271 health record that is given to every baby). The 'DS insert' contains the appropriate growth  
6  
7 272 charts reflecting a tendency to 'normal', slower growth trajectory in this condition compared  
8  
9 273 to non-trisomy infants (16).

10  
11  
12 274

13  
14 275 Over half of the mothers said that they would have liked to have breastfed for longer (20/37,  
15  
16 276 (54%)). Reasons for stopping breastfeeding included inadequate breastmilk supply, issues  
17  
18 277 with expressing breast milk and their infants having faltering growth. The quotes in Table 4  
19  
20 278 illustrate the reasons mothers gave for stopping breastfeeding.

21  
22  
23 279

24  
25 280 Mothers were asked "What would have helped you breastfeed longer?" the answers included  
26  
27 281 not introducing bottles as early, not needing to express, being at home and having more  
28  
29 282 specific support. Quotes from the initial, 7-month and 12-month questionnaires in response to  
30  
31 283 this question are given in Table 4. Some mothers also used this question to explain that they  
32  
33 284 did breastfeed.

34  
35  
36 285

37  
38  
39  
40 286 **Discussion:**

41  
42 287

43  
44 288 We have shown that exclusive breastfeeding amongst the infants with DS at six months is  
45  
46 289 comparable to the general population (4% vs 1%). Apart from exclusive breastfeeding at six  
47  
48 290 weeks when prevalence was similar (21% of infants with DS versus 23% in the general  
49  
50 291 population), breastfeeding (exclusive or combination feeding) amongst the study participants  
51  
52 292 was higher at all time points than levels reported in the general population (15). This was  
53  
54 293 surprising and does not support the hypothesis that hypotonia and oro-motor issues associated  
55  
56 294 with DS significantly alters ability to breastfeed. This is an important and encouraging  
57  
58  
59  
60

1  
2  
3 295 message for mothers and should inspire midwives and health professionals to support breast  
4  
5 296 feeding. These findings suggest that the frequently heard mantra, that infants with DS  
6  
7 297 probably will not breastfeed successfully, needs to be changed.  
8  
9

10 298  
11  
12 299 Formula was introduced very early at a median of five days with 77% having started by the  
13  
14 300 age of six weeks. Overall, over half of the mothers were still breastfeeding beyond the age of  
15  
16 301 six months (including infants who combination fed with breastmilk and infant formula)  
17  
18 302 which is a very positive message for families. This is higher than the 34% at six months  
19  
20 303 within the general population. Due to the wording of the questionnaire, it was not possible to  
21  
22 304 distinguish between those who directly breastfed or those who gave expressed breastmilk,  
23  
24 305 and this would be useful to include in future questionnaires.  
25  
26  
27  
28  
29

30 306  
31 307 Over half of FADES infants were admitted to SCBU, all being NG tube fed. In around 40%,  
32  
33 308 issues with feeding were responsible for NG placement and for most of these participants,  
34  
35 309 this was also the reason for SCBU admission. Almost 70% of the mothers said that having  
36  
37 310 their baby in SCBU had affected their ability to feed the way they would have liked. This is  
38  
39 311 possibly open to intervention as some admissions might be prevented with more  
40  
41 312 specialised/tailored support on the postnatal wards. Some hospitals will only have one or two  
42  
43 313 infants born a year with DS, possibly leading to automatic SCBU admissions with increased  
44  
45 314 levels of anxiety around potential complications and associated conditions. In terms of oro-  
46  
47 315 motor skill development, it is important that infants have the chance to feed orally early on.  
48  
49 316 This is postulated to be important for the development of oral skills, tolerance of tastes and  
50  
51 317 textures and is also important for social development (17). Most infants in our cohort  
52  
53 318 required NG tube feeds for less than two weeks but a third also required feeds to be stopped  
54  
55 319 altogether at some point and were put onto intravenous fluids.  
56  
57  
58  
59  
60

1  
2  
3 320

4  
5 321 NG tube feeding was required for some infants due to dehydration, jaundice, polycythaemia  
6  
7 322 and vomiting. Although classified as a 'medical' reason, inability to feed may have  
8  
9 323 contributed or caused these issues. Other 'medical' reasons included prematurity, ventilation  
10  
11 324 or surgical abdomen. Prevalence of NG tube feeding in the general population and in the  
12  
13 325 typical DS population are poorly reported. A third of those NG fed infants continued to  
14  
15 326 receive exclusively expressed breastmilk. Many of the infants were fed using expressed  
16  
17 327 breastmilk either for NG tube feeds or for top up feeds via alternative feeding methods  
18  
19 328 including bottle.  
20  
21  
22  
23

24 329

25  
26 330 Lethargy was the most commonly reported problem with feeding after discharge with far  
27  
28 331 fewer citing poor latch than during the initial admission. Importantly 16% of the mothers said  
29  
30 332 that poor weight gain or weight loss was an issue. It is of concern that over a quarter of the  
31  
32 333 mothers reported that they were not given the correct 'DS insert' in their Personal Child  
33  
34 334 Health Record ('Red' book) (16). Healthy infants with DS gain weight more slowly than  
35  
36 335 other infants and it is important to account for this when assessing feeding and growth. If an  
37  
38 336 infant with DS is plotted on a standard growth chart they will appear to be failing to thrive  
39  
40 337 and a mother who is successfully feeding her baby, may be told that she needs to supplement  
41  
42 338 feeds, start formula feeds if she is breastfeeding or even that her baby needs admission to  
43  
44 339 hospital.  
45  
46  
47  
48

49 340

50  
51 341 Although the number of participants is relatively high compared to other cohorts of infants  
52  
53 342 with DS, the small number in this paper means that caution needs to be used when drawing  
54  
55 343 conclusions. Those infants born with a child protection plan, fostered, or adopted, and parents  
56  
57 344 who do not speak English did not meet the inclusion criteria. Therefore, we are likely to have  
58  
59  
60

1  
2  
3 345 excluded some of the most disadvantaged of our population. The higher levels of  
4  
5 346 breastfeeding in the study compared to the general population may in part, be due to selection  
6  
7 347 bias. Mothers who have chosen to take part in the study may already have a specific interest  
8  
9 348 in infant feeding. In the UK, higher breastfeeding frequency is described in mothers over 30  
10  
11 349 years of age (87%) (15) which may also explain the higher level of initial breastfeeding in  
12  
13 350 FADES. The karyotype for the infants in the cohort was not requested which might be  
14  
15 351 considered a weakness of the study. FADES potentially might include children with mosaic  
16  
17 352 Down syndrome who can be phenotypically milder although this is rare: Only one to three  
18  
19 353 percent of DS children have Mosaicism (18).  
20  
21  
22  
23

24 354  
25  
26 355 Reasons for stopping breastfeeding were similar to the IFS 2010 (15) with inadequate  
27  
28 356 breastmilk supply and faltering growth being common. However, a large proportion  
29  
30 357 mentioned issues surrounding expressing milk. This highlights the need for mothers who are  
31  
32 358 expressing to receive tailored support. Mothers were asked “What would have helped you  
33  
34 359 breastfeed longer” the responses indicated that mothers understandably wanted ‘normality’,  
35  
36 360 they wanted their infants to be well, to not require bottle or expressed milk and to be at home.  
37  
38 361 Although it is not possible to change these factors for many, every effort should be made to  
39  
40 362 listen to maternal wishes and assist where possible. Some mothers used this questionnaire to  
41  
42 363 voice their frustration at alternative feeding methods being introduced ‘too early’ or ‘against  
43  
44 364 their wishes’.  
45  
46  
47  
48

49 365  
50  
51 366 It is a strength of the study that the families recruited were representative of the general  
52  
53 367 population of children with DS, with similar numbers of children having associated  
54  
55 368 conditions including cardiac abnormalities as reported in other studies (19). The eligibility  
56  
57 369 criteria were broad and did not exclude any medical conditions. A further strength is that the  
58  
59  
60

1  
2  
3 370 study was UK wide reducing selection bias. Those who could not speak English were  
4  
5 371 excluded and this may have had altered feeding results with cultural differences in early  
6  
7 372 feeding (20). Translating all study documentation however was not possible for the multiple  
8  
9 373 languages now represented in UK population.  
10  
11

12 374

13  
14 375 These results raise some important questions and highlight potential opportunities for  
15  
16 376 interventions in relation to feeding support for mothers of infants with DS. Any advice given  
17  
18 377 to mothers on feeding a baby with DS based on this study should include the message that  
19  
20 378 infants with DS can be exclusively breastfed or receive a combination of breast and formula  
21  
22 379 feeds. However, some may need to include expressed breastmilk and alternative feeding  
23  
24 380 methods. Providing mothers with access to tailored support and advice specifically around  
25  
26 381 expressing should be included, as should information on NG tube feeding.  
27  
28  
29

30 382

31  
32  
33 **Conclusion:**

34  
35 384 This paper provides critical understanding of the early breastfeeding practices and  
36  
37 385 experiences of mothers with infants. It is clear that many infants with DS can breastfeed  
38  
39 386 exclusively for six months as per WHO guidelines. Our study shows that almost two-thirds of  
40  
41 387 babies with DS were being breast fed at 6 months. This may require significant perseverance  
42  
43 388 from the mother and supportive professionals, as establishing breastfeeding can be  
44  
45 389 challenging. Oro-motor difficulties and significant medical needs may underlie some  
46  
47 390 challenges, but overall, mothers who wish to breastfeed should be encouraged and supported  
48  
49 391 to do so as success is possible.  
50  
51

52 392

53  
54 393

55  
56 394  
57  
58  
59  
60

1  
2  
3 395 Boxes – What is already known on this topic (bullet points)  
4

- 5 396 • Infants with DS have anatomical and physiological features that may affect their  
6  
7  
8 397 ability to feed but this is phenotypically variable.  
9  
10 398 • Infants with DS have associated medical conditions including congenital heart  
11  
12  
13 399 disease and gastro-intestinal abnormalities which may impact on early feeding.  
14  
15 400 • Prevalence of NG Tube feeding in infants with DS has previously been reported as up  
16  
17  
18 401 to 40%.

19  
20 402

21  
22 403 What this study adds

- 23  
24  
25 404 • Breastfeeding prevalence amongst infants with DS are equivalent to the general  
26  
27 405 population at 6 months.  
28  
29  
30 406 • Infants with DS can receive exclusive breast-milk feeds for over 6 months.  
31  
32 407 • Early and extra post-natal support for breast feeding may be beneficial.  
33  
34  
35 408 • At least half of infants with DS in this UK wide cohort study receive nasogastric feeds.  
36

37 409

38  
39  
40 410 How this Study might affect research, practice or policy

- 41  
42 411 • This study seeks to promote an increase in tailored feeding support for mother's of  
43  
44 412 infants with DS.  
45  
46  
47 413 • Key findings from this study may contribute to positive changes in breastfeeding  
48  
49 414 advice and support for mother's of infants with DS.  
50  
51  
52 415 • The high prevalence of infants receiving naso-gastric tube feeds warrants further  
53  
54 416 research and potentially change in policy within neonatal units.  
55

56  
57 417  
58  
59  
60

1  
2  
3 418 **Funding Statement:** This work was supported by the NIHR Bristol Biomedical Research  
4  
5 419 Centre Nutrition Theme.

6  
7 420 **Competing interests:** No competing interests

8  
9 421 **Authors Contribution:** Georgina M.G. Williams was the chief investigator and PhD student,  
10  
11 422 wrote the protocol, completed the data collection, data analysis and drafts of the manuscript.  
12  
13 423 Sam Leary was the lead statistician on the study and PhD supervisor. She contributed to the  
14  
15 424 protocol and study design, data analysis and draft manuscripts of the paper. Sofia Leadbetter  
16  
17 425 provided the administrative support and coordination for the study, she was involved in  
18  
19 426 participant recruitment and data collection. Stu Toms contributed to the study design, online  
20  
21 427 questionnaires and managed the study database. Georgina Mortimer contributed to the data  
22  
23 428 collection and coordinates sample collection for the FADES study. Tim Scorrer recruited  
24  
25 429 participants for the study and reviewed draft manuscripts of the paper. Kathleen Gillespie  
26  
27 430 (PhD supervisor) contributed to the study protocol, study design and reviewed draft  
28  
29 431 manuscripts of the article. Julian Hamilton Shield (PhD supervisor) contributed to the study  
30  
31 432 protocol, study design and reviewed draft manuscripts of the articles.  
32  
33  
34  
35  
36

37 433 **Data Sharing:** Data sets may only be available by individual request to the Corresponding  
38  
39 434 Author.  
40

41  
42 435

#### 43 436 **References**

- 44  
45  
46 437 1. Kliegman, Robert M. (2011). "Down Syndrome and Other Abnormalities of  
47 438 Chromosome Number". Nelson textbook of pediatrics (19th ed.). Philadelphia:  
48 439 Saunders. pp. Chapter 76.2. ISBN 978-1-4377-0755-7  
49  
50 440 2. Kumin L, Von Hagel KC, Bahr DC. An effective oral motor intervention protocol for  
51 441 infants and toddlers with low muscle tone. *Infant Toddler Intervention*. 2001  
52 442 Sep;11(3/4):181-200.  
53  
54 443 3. Kumin L, Bahr DC. Patterns of feeding, eating, and drinking in young children with  
55 444 Down syndrome with oral motor concerns. *Down Syndrome Quarterly*. 1999  
56 445 Jun;4(2):1-8.  
57  
58 446 4. Lewis E, Kritzinger A. Parental experiences of feeding problems in their infants with  
59 447 Down syndrome. *Down Syndrome Research and Practice*. 2004 Jan 1;9(2):45-52.  
60

- 1  
2  
3 448 5. World Health Organisation. 2009. "The optimal duration of exclusive breastfeeding:  
4 449 report of an expert consultation. 2002." World Health Organisation: Geneva.
- 5 450 6. Malcova H, Sumnik Z, Drevinek P, Venhacova J, Lebl J, Cinek O. Absence of breast-  
7 451 feeding is associated with the risk of type 1 diabetes: a case-control study in a  
8 452 population with rapidly increasing incidence. *European journal of pediatrics*. 2006  
9 453 Feb;165(2):114-9.
- 10 454 7. Sollid LM. Breast milk against coeliac disease. *Gut*. 2002 Dec 1;51(6):767-8
- 11 455 8. Akobeng AK, Ramanan AV, Buchan I, Heller RF. Effect of breast feeding on risk of  
12 456 coeliac disease: a systematic review and meta-analysis of observational studies.  
13 457 *Archives of disease in childhood*. 2006 Jan 1;91(1):39-43.
- 14 458 9. Bowatte G, Tham R, Allen KJ, Tan DJ, Lau MX, Dai X, Lodge CJ. Breastfeeding and  
15 459 childhood acute otitis media: a systematic review and meta-analysis. *Acta*  
16 460 *Paediatrica*. 2015 Dec;104:85-95
- 17 461 10. Bloemers BL, Broers CJ, Bont L, Weijerman ME, Gemke RJ, van Furth AM. Increased  
18 462 risk of respiratory tract infections in children with Down syndrome: the consequence  
19 463 of an altered immune system. *Microbes and infection*. 2010 Oct 1;12(11):799-808.
- 20 464 11. CDSS. 2018. "The Children with Downs Syndrome Study." accessed 12.11.2018.  
21 465 <https://www.cdss.org.uk>.
- 22 466 12. LonDownS Consortium. [www.ucl.ac.uk/london-down-syndrome-consortium](http://www.ucl.ac.uk/london-down-syndrome-consortium)
- 23 467 13. Cunningham, Cliff. 1996. "Families of children with Down syndrome." *Down*  
24 468 *Syndrome Research and Practice* 4 (3):87-95.
- 25 469 14. Carr, Janet. 1988. "Six weeks to twenty-one years old: A longitudinal study of  
26 470 children with Down's syndrome and their families." *Journal of child Psychology and*  
27 471 *Psychiatry* 29 (4):407-431.
- 28 472 15. McAndrew F, Thompson J, Fellows L, Large A, Speed M, Renfrew MJ. Infant feeding  
29 473 survey 2010. Leeds: health and social care information Centre. 2012 Nov 20;2(1).
- 30 474 16. DSMIG. 2019b. "Personal Child Health Record, Down Syndrome Medical Interest  
31 475 Group." accessed 04.07.2019. [https://www.dsmig.org.uk/information-](https://www.dsmig.org.uk/information-resources/personal-child-health-record-pchr/)  
32 476 [resources/personal-child-health-record-pchr/](https://www.dsmig.org.uk/information-resources/personal-child-health-record-pchr/).
- 33 477 17. Mason SJ, Harris G, Blissett J. Tube feeding in infancy: implications for the  
34 478 development of normal eating and drinking skills. *Dysphagia*. 2005 Mar;20(1):46-61.
- 35 479 18. Devlin L, Morrison PJ. Mosaic Down's syndrome prevalence in a complete population  
36 480 study. *Archives of disease in childhood*. 2004 Dec 1;89(12):1177-8.
- 37 481 19. Roizen, Nancy J, and David Patterson. 2003. "Down's syndrome." *The Lancet* 361  
38 482 (9365):1281-1289.
- 39 483 20. Griffiths LJ, Tate AR, Dezateux C. The contribution of parental and community  
40 484 ethnicity to breastfeeding practices: evidence from the Millennium Cohort Study.  
41 485 *International Journal of Epidemiology*. 2005 Dec 1;34(6):1378-86
- 42 486
- 43 487
- 44 488
- 45 489
- 46 490
- 47 491
- 48 492
- 49 493
- 50
- 51
- 52
- 53
- 54
- 55
- 56
- 57
- 58
- 59
- 60



# BMJ Paediatrics Open

## Establishing breast feeding in Infants with Down syndrome: the FADES cohort experience

|                               |                                                                                                                                                                                                                                                                                                                                                                                                                                                                                                                                                                                                                |
|-------------------------------|----------------------------------------------------------------------------------------------------------------------------------------------------------------------------------------------------------------------------------------------------------------------------------------------------------------------------------------------------------------------------------------------------------------------------------------------------------------------------------------------------------------------------------------------------------------------------------------------------------------|
| Journal:                      | <i>BMJ Paediatrics Open</i>                                                                                                                                                                                                                                                                                                                                                                                                                                                                                                                                                                                    |
| Manuscript ID                 | bmjpo-2022-001547.R2                                                                                                                                                                                                                                                                                                                                                                                                                                                                                                                                                                                           |
| Article Type:                 | Original research                                                                                                                                                                                                                                                                                                                                                                                                                                                                                                                                                                                              |
| Date Submitted by the Author: | 07-Oct-2022                                                                                                                                                                                                                                                                                                                                                                                                                                                                                                                                                                                                    |
| Complete List of Authors:     | Williams, Georgina; NIHR Bristol Biomedical Research Centre; University of Bristol, Translational Health Sciences<br>Leary, Sam; NIHR Bristol Biomedical Research Centre<br>Leadbetter, Sofia; NIHR Bristol Biomedical Research Centre<br>Toms, Stu; NIHR Bristol Biomedical Research Centre<br>Mortimer, Georgina ; University of Bristol, Translational Health Sciences<br>Scorrer, Tim; Portsmouth Hospitals University NHS Trust, Neonatology<br>Gillespie, Kathleen; University of Bristol, Translational Health Sciences<br>Shield, Julian; University of Bristol, Biomedical Research Unit in Nutrition |
| Keywords:                     | Epidemiology, Syndrome                                                                                                                                                                                                                                                                                                                                                                                                                                                                                                                                                                                         |
|                               |                                                                                                                                                                                                                                                                                                                                                                                                                                                                                                                                                                                                                |

SCHOLARONE™  
Manuscripts



I, the Submitting Author has the right to grant and does grant on behalf of all authors of the Work (as defined in the below author licence), an exclusive licence and/or a non-exclusive licence for contributions from authors who are: i) UK Crown employees; ii) where BMJ has agreed a CC-BY licence shall apply, and/or iii) in accordance with the terms applicable for US Federal Government officers or employees acting as part of their official duties; on a worldwide, perpetual, irrevocable, royalty-free basis to BMJ Publishing Group Ltd ("BMJ") its licensees and where the relevant Journal is co-owned by BMJ to the co-owners of the Journal, to publish the Work in this journal and any other BMJ products and to exploit all rights, as set out in our [licence](#).

The Submitting Author accepts and understands that any supply made under these terms is made by BMJ to the Submitting Author unless you are acting as an employee on behalf of your employer or a postgraduate student of an affiliated institution which is paying any applicable article publishing charge ("APC") for Open Access articles. Where the Submitting Author wishes to make the Work available on an Open Access basis (and intends to pay the relevant APC), the terms of reuse of such Open Access shall be governed by a Creative Commons licence – details of these licences and which [Creative Commons](#) licence will apply to this Work are set out in our licence referred to above.

Other than as permitted in any relevant BMJ Author's Self Archiving Policies, I confirm this Work has not been accepted for publication elsewhere, is not being considered for publication elsewhere and does not duplicate material already published. I confirm all authors consent to publication of this Work and authorise the granting of this licence.

1  
2  
3 1 **Title Page:**  
4

5  
6 2 **Establishing breast feeding in infants with Down syndrome: the**  
7  
8  
9 3 **FADES cohort experience**  
10

11 4 Georgina M.G. Williams<sup>1,2,3,4</sup>, Sam Leary<sup>1</sup>, Sofia Leadbetter<sup>1</sup>, Stu Toms<sup>1</sup>, Georgina  
12  
13  
14 5 Mortimer<sup>2</sup>, Tim Scorrer<sup>5</sup>, Kathleen Gillespie<sup>2</sup>, Julian Hamilton Shield<sup>1,2,3</sup>  
15

16  
17  
18 7 Affiliations:  
19

20 8 <sup>1</sup>NIHR Bristol Biomedical Research Centre Nutrition Theme, University of Bristol, Bristol, England  
21

22 9 <sup>2</sup>Translational Health Sciences, University of Bristol, Bristol, England  
23

24 10 <sup>3</sup>Bristol Royal Hospital for Children, University Hospitals Bristol and Weston NHS Foundation Trust, Bristol,  
25  
26 11 England  
27

28 12 <sup>4</sup>Noah's Ark Children's Hospital for Wales, Cardiff and Vale University Health Board,  
29

30 13 <sup>5</sup>Portsmouth Hospitals University NHS Trust. Portsmouth, England.  
31  
32  
33

34 15 Corresponding Author:  
35

36 16 Dr Georgina Williams  
37

38 17 NIHR Biomedical Research Centre Bristol Nutrition Theme  
39

40 18 Level 3,  
41  
42

43 19 University Hospitals Bristol Education & Research Centre  
44

45 20 Upper Maudlin Street, Bristol  
46

47 21 BS2 8AE  
48  
49  
50  
51

52 23 Funding Source: NIHR Bristol Biomedical Research Centre Nutrition Theme, University of  
53  
54 24 Bristol, Bristol, England  
55

56  
57 25

58  
59 26 Word Count: 2753 words  
60

1  
2  
3 27  
4  
5  
6 28 **Abstract:**  
7  
8 29 Objective: To describe breast feeding prevalence, and maternal experience in infants with  
9  
10 30 Trisomy 21.  
11  
12 31 Design: Longitudinal cohort study  
13  
14 32 Setting: Participants from UK recruited through websites, social media and local  
15  
16 33 collaborators: neonatologists, community paediatricians and research nurses.  
17  
18 34 Subjects: Infants under the age of 8 months with Down syndrome (DS) recruited to the  
19  
20 35 FADES (Feeding and Autoimmunity in Down Syndrome Evaluation Study) between the 1<sup>st</sup>  
21  
22 36 September 2014 to 31<sup>st</sup> August 2017. Seventy participants: median age 20 weeks  
23  
24 37 (Interquartile range (IQR) 13, 29 weeks) at initial questionnaire.  
25  
26 38 Main outcome measure: Breastfeeding prevalence at 6 weeks and 6 months amongst infants  
27  
28 39 with DS.  
29  
30 40 Results: The prevalence of exclusive breastfeeding amongst study participants was similar to  
31  
32 41 the general population (13/61 21% vs 23% at 6 weeks, 2/54 4% vs 1% at 6 months).  
33  
34 42 However, the prevalence of breastfeeding (exclusive or combination feeding) amongst the  
35  
36 43 study participants was higher than the general population (39/61 64% vs 55% at 6 weeks,  
37  
38 44 32/59 54% vs 34% at 6 months).  
39  
40 45 Conclusion: Although there may be challenges in establishing breastfeeding in infants with  
41  
42 46 DS, our data suggest that exclusive breastfeeding is possible for some, and the prevalence of  
43  
44 47 breastfeeding is comparable to the prevalence in the general population.  
45  
46 48 Trial Registration: ISRCTN 12415856  
47  
48 49  
49  
50 50  
51  
52 51 **Keywords: Down Syndrome, Trisomy 21, Feeding, Breast-feeding,**  
53  
54  
55  
56  
57  
58  
59  
60 52

## 53 **Background**

54

55 Down syndrome (DS) is caused by trisomy of chromosome 21. DS is usually diagnosed  
56 antenatally or in the first few days of life by recognition of salient features (1). A number of  
57 associated conditions including congenital heart disease and gastrointestinal complications  
58 can cause additional challenges during the neonatal period.

59

60 Current World Health Organisation (WHO) recommendations are that infants should be  
61 exclusively breastfed until 6 months (5), this is based on the health benefits for mother and  
62 baby. Prolonged exclusive breastfeeding is possibly protective against some autoimmune  
63 conditions including type 1 diabetes and coeliac disease for which children with DS are at  
64 increased risk (6,7,8). Furthermore, there is evidence that breastfeeding exclusively or  
65 combined feeding to a lesser but significant extent, enhances immunity and is protective  
66 against otitis media and respiratory tract infections (9) both being more prevalent in children  
67 with DS (10).

68

69 Infants with DS may have oral, anatomical and physiological abnormalities affecting their  
70 ability to feed normally: as with other features of DS there is phenotypic variability. To  
71 breastfeed effectively, a tight oral/nipple seal needs to be induced with the tongue making a  
72 groove and the lips sealing around the nipple. For a baby with DS, the flattened shape of the  
73 tongue and low tone in the oral structures means that establishing breastfeeding may be  
74 challenging. (2,3). Lewis et al reported that 40% of DS infants had been naso-gastric (NG)  
75 tube fed during the neonatal period illustrating some of the issues with feeding (4).

76

1  
2  
3 77 Many countries have registers which provide data on people with DS. These have facilitated  
4  
5 78 retrospective studies providing statistics on for example: birth and death rates and congenital  
6  
7 79 anomalies. However longitudinal birth cohort studies of infants with DS in the UK are rare  
8  
9  
10 80 (11,12,13,14). The FADES (Feeding and Autoimmunity in Down Syndrome Evaluation  
11  
12 81 Study) was established to investigate early feeding and the development of autoimmunity.  
13  
14 82 Medical and detailed feeding data are collected by mothers from birth and includes both  
15  
16 83 feeding in the hospital settings and at home. A study hypothesis is that infants with DS have  
17  
18 84 difficulties with establishing breast feeding and are therefore introduced to formula feeds at  
19  
20 85 an earlier age. The aim of this paper is to describe breastfeeding prevalence and experiences  
21  
22 86 among infants with DS and their mothers, in the first six months of life. This paper describes  
23  
24 87 findings from the analysis of the feeding data collected between September 2014 and August  
25  
26 88 2017, to explore this and compare to breastfeeding prevalence in the general population.  
27  
28  
29  
30  
31  
32

### 33 **Methods:**

34  
35 91  
36  
37 92 FADES is an ongoing UK wide study recruiting infants with DS antenatally or in the first  
38  
39 93 eight months of life. Exclusion criteria are infants born with a child protection plan, fostered  
40  
41 94 or adopted, >8 months or parents do not speak English. Participants are recruited either by  
42  
43 95 health professionals including neonatologists, community paediatricians and research nurses  
44  
45 96 or via web recruitment through the Downs Syndrome Association, Downs Syndrome  
46  
47 97 Scotland, and other websites and social media [https://www.bristolbrc.nihr.ac.uk/our-](https://www.bristolbrc.nihr.ac.uk/our-research/nutrition-diet-and-lifestyle/childhood/fades-study-2/)  
48  
49 98 [research/nutrition-diet-and-lifestyle/childhood/fades-study-2/](https://www.bristolbrc.nihr.ac.uk/our-research/nutrition-diet-and-lifestyle/childhood/fades-study-2/). A combined feeding and  
50  
51 99 medical questionnaire is completed by families at recruitment (initial questionnaire), at six to  
52  
53 100 eight months of life (7-month questionnaire) and then at 12 months (12-month questionnaire).  
54  
55  
56 101 Feeding questions are based on those from the Infant Feeding Survey (IFS) 2010 (15),  
57  
58  
59  
60

1  
2  
3 102 medical questions are related to conditions associated with DS, hospital admissions and  
4  
5 103 antibiotic usage. Mothers are able to provide free text answers to some questions and quotes  
6  
7  
8 104 from these have been used to illustrate key points. A full qualitative study and analysis has  
9  
10 105 not been completed as part of this feasibility study. This paper presents data collected in the  
11  
12 106 first three years of recruitment from 1<sup>st</sup> September 2014 to 31<sup>st</sup> August 2017 when the  
13  
14 107 feasibility assessment was conducted.  
15  
16  
17 108

19 109 **Statistical Analysis:** As a feasibility study, analysis of the questionnaires is descriptive as  
20  
21 110 there is not enough power to statistically test for associations. Frequencies were derived and  
22  
23 111 presented as percentages for categorical variables. For continuous data, means and standard  
24  
25 112 deviations (SDs) were presented for data that were approximately normal, and medians and  
26  
27 113 interquartile ranges (IQRs) for non-normal data. Analysis used STATA vs. 15. Comparisons  
28  
29 114 are made with the general population from the results reported by the IFS 2010 (15).  
30  
31  
32  
33 115

35 116 **Public involvement:** The study design including recruitment and data collection methods  
36  
37 117 were established following discussion with and involvement of the Downs Syndrome  
38  
39 118 Association. Local members (all of whom were parents of a child with DS) advised on the  
40  
41 119 wording and feasibility of the feeding and medical questionnaires.  
42  
43  
44  
45 120

46  
47 121 Ethics approval for FADES was given by the National Research Ethics Service (NRES)  
48  
49 122 Committee South West – Central Bristol 23<sup>rd</sup> April 2014 14/SW/0030 and it is an NIHR  
50  
51 123 Portfolio study.  
52  
53  
54 124

55  
56 125

57  
58 126

59  
60

1  
2  
3 127 **Results:**  
4

5 128  
6

7  
8 129 Seventy participants were recruited between the 1<sup>st</sup> September 2014 and the 31<sup>st</sup> August  
9

10 130 2017. 61 out of the 70 participants (87%) completed the initial feeding and medical  
11

12 131 questionnaire at a median age of 20 weeks (IQR 13, 29 weeks). Of these, approximately a  
13

14 132 quarter (n=15) were diagnosed antenatally with DS. Table 1 summarises maternal  
15

16 133 characteristics and birth details. Over half were born by normal vaginal delivery: median  
17  
18

19 134 gestation, 38 weeks (IQR 37, 39 weeks), mean birthweight of 3kg (SD 0.5kg). Most infants  
20

21 135 were born in hospital units, three were home deliveries. Median hospital stay after birth was  
22

23 136 five days (IQR 3, 9 days).  
24  
25

26 137  
27

28 138  
29

30 139  
31

32 140  
33

34 141  
35

36 142  
37

38 143  
39

40 144  
41

42 145  
43

44 146  
45

46 147  
47

48 148  
49

50 149  
51

52 150  
53

54 151  
55  
56  
57  
58  
59  
60



| Background Characteristics                                       |                                   |             |
|------------------------------------------------------------------|-----------------------------------|-------------|
| Maternal age (years) at time of completing initial questionnaire | 20 to 24                          | 5/61 (8%)   |
|                                                                  | 25 to 29                          | 6/61 (10%)  |
|                                                                  | 30 to 34                          | 15/61 (25%) |
|                                                                  | 35 to 39                          | 23/61 (38%) |
|                                                                  | 40 or over                        | 12/61 (20%) |
| Mother's marital status                                          | Living together                   | 17/61 (28%) |
|                                                                  | Married or in a civil partnership | 40/61 (66%) |
|                                                                  | Single                            | 3/61 (5%)   |
|                                                                  | Widowed, divorced, or separated   | 1/61 (2%)   |
| Mother's ethnic group                                            | Other                             | 2/61 (3%)   |
|                                                                  | White British                     | 53/61 (87%) |
|                                                                  | White Irish                       | 3/61 (5%)   |
|                                                                  | White Other                       | 3/61 (5%)   |
| Birth History                                                    |                                   |             |
| First baby                                                       |                                   | 19/61 (31%) |
| Prenatal diagnosis of DS                                         |                                   | 15/61 (25%) |
| Twin Birth                                                       |                                   | 2/61 (3%)   |
| Type of delivery                                                 | Normal Vaginal delivery           | 38/60 (63%) |
|                                                                  | C-Section                         | 17/60 (28%) |
|                                                                  | Forceps                           | 2/60 (3%)   |
|                                                                  | Ventouse                          | 3/60 (5%)   |
| Gestation (weeks)                                                | Median 38 (IQR 37, 39)            |             |
| Pre-term 32-37 weeks                                             |                                   | 13/61 (21%) |
| Birthweight (kg)                                                 | Mean 3.0 (0.5 SD)                 |             |
| Location of birth                                                | At home                           | 3/59 (5%)   |
|                                                                  | In hospital (consultant led)      | 29/59 (50%) |
|                                                                  | In hospital (midwife led)         | 25/59 (42%) |
|                                                                  | Birth centre (midwife led)        | 2/59 (3%)   |
| Length of initial hospital stay (hours)                          | Median 120 (IQR 72, 216)          |             |

152

153 Table 1: Maternal characteristics and birth details

154 Footnote: DS (Down syndrome), IQR (inter quartile range), SD (standard deviation), C-section (Caesarean  
155 Section)

156

157 Over half (34/61, 56%) were admitted into a special care baby unit (SCBU) with almost a  
158 third of these (10/34, 29%) primarily due to poor feeding. Half of the infants for whom data  
159 were available, required NG tube feeding as shown in Table 2. All admitted to SCBU, were  
160 NG tube fed. Of the 31 infants who were fed via NG tube, 12/31 (39%), primarily required

1  
2  
3 161 NG tube feeds in SCBU due to feeding issues, the remainder due to medical co-morbidities  
4  
5 162 (37% with multiple medical indications). NG tube feeds were mostly expressed breastmilk  
6  
7  
8 163 or a mixture of expressed milk and infant formula. NG tube feeds were required in 19/31  
9  
10 164 (61%) participants for less than two weeks.  
11

12 165

13  
14 166

15  
16 167

17  
18 168

19  
20 169

21  
22 170

23  
24 171

25  
26 172

27  
28 173

29  
30 174

31  
32 175

33  
34 176

35  
36 177

37  
38 178

39  
40 179

41  
42 180

43  
44 181

45  
46 182

47  
48 183

49  
50 184

51  
52 185

53  
54  
55  
56  
57  
58  
59  
60

| SCBU Admission                                                                 |                                          |                     |
|--------------------------------------------------------------------------------|------------------------------------------|---------------------|
| Admitted to SCBU                                                               |                                          | 34/61 (56%)         |
| Admitted to SCBU due to problems with feeding                                  |                                          | 10/34 (29%)         |
| Admitted to SCBU for any other reason*                                         |                                          | 24/34 (71%)         |
| Hypoxia / respiratory distress / PPHN                                          |                                          | 17/34 (50%)         |
| Jaundice                                                                       |                                          | 7/34 (21%)          |
| Cardiac / cardiac monitoring                                                   |                                          | 4/34 (12%)          |
| Infection                                                                      |                                          | 4/34 (12%)          |
| Prematurity                                                                    |                                          | 3/34 (9%)           |
| Polycythaemia                                                                  |                                          | 2/34 (6%)           |
| Other                                                                          |                                          | 7/34 (21%)          |
| Length of SCBU stay (weeks)                                                    |                                          | Median 2 (IQR 2, 4) |
| Feeding in SCBU and NG tube Feeds                                              |                                          |                     |
| SCBU admission affected ability of mother to feed baby as she would have liked |                                          | 23/34 (68%)         |
| Shown how to express milk in SCBU                                              |                                          | 29/34 (85%)         |
| Felt supported to express milk in SCBU                                         |                                          | 27/30 (90%)         |
| Had NG tube feeds                                                              |                                          | 31/31* (100%)       |
| Required NG tube feeds due to problems with feeding                            |                                          | 12/31 (39%)         |
| Medical reason for NG tube feeds**                                             | Prematurity                              | 2/19 (11%)          |
|                                                                                | Dehydration / hydration                  | 2/19 (11%)          |
|                                                                                | Ventilation                              | 2/19 (11%)          |
|                                                                                | Respiratory problems                     | 8/19 (42%)          |
|                                                                                | Jaundice / polycythaemia                 | 4/19 (21%)          |
|                                                                                | Vomiting or surgical abdomen             | 4/19 (21%)          |
| Length of time NG tube fed                                                     | < 3 days                                 | 5/31 (16%)          |
|                                                                                | > 3 to 7 days                            | 6/31 (19%)          |
|                                                                                | > 1 to 2 weeks                           | 8/31 (26%)          |
|                                                                                | > 2 to 4 weeks                           | 6/31 (19%)          |
|                                                                                | > 1 to 2 months                          | 5/31 (16%)          |
|                                                                                | > 2months                                | 1/31 (3%)           |
| Type of NG tube feeds given                                                    | Only expressed breast milk               | 10/31 (32%)         |
|                                                                                | Only infant formula                      | 2/31 (7%)           |
|                                                                                | Expressed breast milk and infant formula | 19/31 (61%)         |
| Feeds stopped and IV fluids given                                              |                                          | 11/34 (32%)         |
| Length of time on IV fluids                                                    | < 3 days                                 | 2/9 (22%)           |
|                                                                                | > 3 to 7 days                            | 4/9 (44%)           |
|                                                                                | > 7 days to 1 month                      | 3/9 (33%)           |

186

187 Table 2: Feeding in SCBU (special care baby unit) and NG (nasogastric) tube feeds

188

189 Footnote: IV fluids (Intra- venous fluids), PPHN (persistent pulmonary hypertension of the newborn),

190 \*Due to an issue with branching of the questions at least 31 infants were NG tube fed but there may have been

191 more. Where they were branched away, people have been counted as missing, so the denominator is 31.

192 \*\*Coded from open response

1  
2  
3 193 Of the mothers receiving an antenatal diagnosis for their baby, 13/15 (87%) were told about  
4  
5 194 problems relating to feeding but only three (3/15, (20%)) received any specific antenatal  
6  
7 195 advice about breastfeeding a baby with DS. Most mothers initially breastfed their baby, with  
8  
9  
10 196 47/60 (78%) having skin to skin contact within 24 hours of birth (Table 3). Feeding problems  
11  
12 197 that were experienced in the hospital or birthing centre by mothers, included those commonly  
13  
14 198 associated with infants with DS such as poor latch and lethargy. Although hypotonia is one of  
15  
16 199 the explanations frequently given as a cause for feeding difficulties, only one parent  
17  
18 200 described this feature. Mothers provided responses to an open question regarding feeding  
19  
20 201 their baby in the hospital, birth centre or unit as illustrated in the quotes in Table 4.  
21  
22  
23  
24 202  
25  
26 203  
27  
28 204  
29  
30 205  
31  
32 206  
33  
34 207  
35  
36 208  
37  
38 209  
39  
40 210  
41  
42 211  
43  
44 212  
45  
46 213  
47  
48 214  
49  
50 215  
51  
52 216  
53  
54 217  
55  
56  
57  
58  
59  
60

| First Feeds                                                                        |                                |                |
|------------------------------------------------------------------------------------|--------------------------------|----------------|
| Ever breastfed or received expressed breast milk                                   |                                | 55/61 (90%)    |
| Had skin to skin contact within 24hrs of birth                                     |                                | 47/60 (78%)    |
| Maternal health problems after birth that affected feeding                         |                                | 4/61 (7%)      |
| Received help with breastfeeding within first few days                             |                                | 40/60 (67%)    |
| How soon after birth was baby put to the breast                                    | within a few minutes           | 14/55 (26%)    |
|                                                                                    | <30 min                        | 17/55 (31%)    |
|                                                                                    | 30 min to 1 hr                 | 9/55 (16%)     |
|                                                                                    | >1 hr to 8 hrs                 | 3/55 (6%)      |
|                                                                                    | >8 hrs to 24 hrs               | 3/55 (6%)      |
|                                                                                    | > 24 hrs later                 | 9/55 (16%)     |
| Experienced problems when feeding their baby in the hospital, birth centre or unit |                                | 45/58* (78%)   |
| Common problems with feeding**                                                     | Poor latch                     | 20/45 (44%)    |
|                                                                                    | Medical issue                  | 14/45 (31%)    |
|                                                                                    | Jaundice                       | 14/45 (31%)    |
|                                                                                    | Tired / lethargic              | 13/45 (29%)    |
|                                                                                    | Maternal reason                | 4/45 (9%)      |
|                                                                                    | Tongue size/ position          | 3/45 (7%)      |
|                                                                                    | Low tone                       | 1/45 (2%)      |
| Reported that they received enough help with feeding in hospital / birth centre    |                                | 48/58 (83%)    |
| General Feeding and feeding after discharge from hospital / birth centre           |                                |                |
| Problems with feeding baby after discharge from hospital / birth centre            |                                | 30/56 (54%)    |
| Problems with feeding after discharge**                                            |                                |                |
|                                                                                    | Lethargy                       | 13/61 (21%)    |
|                                                                                    | Poor weight gain / weight loss | 10/61 (16%)    |
|                                                                                    | Low tone                       | 1/61 (2%)      |
|                                                                                    | Latch                          | 5/61 (8%)      |
|                                                                                    | Medical                        | 3/61 (5%)      |
|                                                                                    | Jaundice                       | 3/61 (5%)      |
|                                                                                    | Reflux                         | 3/61 (5%)      |
| Received help or information with feeding problems after discharge                 |                                | 27/32*** (84%) |

218

219 Table 3: First feeds and feeding after discharge

220 Footnote:\* Three infants were home births \*\* These problems were coded from open responses

221 \*\*\*This denominator comes from the 30 participants who experienced problems with feeding after discharge

222 from hospital and two who experienced problems with feeding after their home birth.

223

224

225

226

227

228

229

230

231

232

233

|                                                            |                                                                                                                                                                                                                                                                                                                                                                                                                                                                                                                                                                                                                                                                                                                                                                                                                                                                                                                                                                                     |
|------------------------------------------------------------|-------------------------------------------------------------------------------------------------------------------------------------------------------------------------------------------------------------------------------------------------------------------------------------------------------------------------------------------------------------------------------------------------------------------------------------------------------------------------------------------------------------------------------------------------------------------------------------------------------------------------------------------------------------------------------------------------------------------------------------------------------------------------------------------------------------------------------------------------------------------------------------------------------------------------------------------------------------------------------------|
| Question from initial questionnaire                        | <b>‘Were there any problems feeding your baby while you were in the hospital, birth centre or unit? What problems were there?’</b>                                                                                                                                                                                                                                                                                                                                                                                                                                                                                                                                                                                                                                                                                                                                                                                                                                                  |
| Quotes                                                     | <p><i>“X would not take anything from the breast and was very sleepy so had an NG tube put in.”</i></p> <p><i>“A feeding tube was inserted straight away, which prevented me from breast feeding. It also prevented her from becoming hungry enough to feed from me”</i></p> <p><i>“baby continually pushing tongue out and could not latch on. Decided to try the bottle which she took immediately so did not try breast again and was not questioned by staff”</i></p>                                                                                                                                                                                                                                                                                                                                                                                                                                                                                                           |
| Question from Initial, 7 month and 12 month questionnaire  | <b>‘Have you stopped breastfeeding (no longer give your baby any expressed milk or put your baby to your breast)? What were your reasons for stopping?’</b>                                                                                                                                                                                                                                                                                                                                                                                                                                                                                                                                                                                                                                                                                                                                                                                                                         |
| Quotes                                                     | <p><i>“Significant weight loss in early days, poor latch, inadequate milk being taken by baby, readmission to hospital for tube feeding, introduction of bottle feeding in hospital, milk supply subsequently drying up due to baby being put on bottle and use of pumps further made milk supply deteriorate.”</i></p> <p><i>“Baby fell asleep too much at the breast to feed properly. It was too time consuming and stressful to keep expressing.”</i></p>                                                                                                                                                                                                                                                                                                                                                                                                                                                                                                                       |
| Question from initial, 7-month and 12-month questionnaires | <b>“What would have helped you breastfeed longer?”</b>                                                                                                                                                                                                                                                                                                                                                                                                                                                                                                                                                                                                                                                                                                                                                                                                                                                                                                                              |
| Quotes                                                     | <p><i>“Knowing as I do now that it's common to have feeding problems with Down syndrome. More specific breastfeeding support.” (from initial questionnaire)</i></p> <p><i>“I feel I was forced to give Child’s name a bottle when she was only a day old as the midwife was unwilling to entertain my concerns about the bottle meaning that she would never take the breast. I had wanted to give the milk by syringe or cup to give her a chance to keep trying the breast, but I was shot down and ridiculed.” (from 7-month questionnaire)</i></p> <p><i>“I just became too sick, unwell but at the same time I fed longer than I thought I would. Thanks to the support I received.” (from 12-month questionnaire)</i></p> <p><i>“She lost 6% of her birth weight by day 9 and the NICU home midwife suggested we move onto top up. I think that was the pinch point. If I had said no, let’s try harder to feed from the breast it might have established itself. But</i></p> |

*she had just been discharged from hospital and I was so reluctant to go back. You really have the threat of readmission hanging over you... I would have loved to feed her myself. It is my biggest sadness but there were too many other variables at play. I am pleased I was able to exclusively breast feed her though for well over 4 months.” (from 12-month questionnaire)*

Table 4: Quotes from free text boxes in initial, 7 month and 12 month questionnaire

Of the 61 mother/baby dyads, 39 (64%) continued some breastfeeding for over six weeks (Table 5) (including infants who received mixed infant formula and breastmilk feeds). Over the age of six months, this decreased to 32 (32/59 (54%)) still breastfeeding in part. These percentages are higher than in the general population, levels reported in the Infant Feeding Survey (IFS) 2010 (55% and 34% respectively) (15). The prevalence of exclusive breastfeeding in the study population at six weeks was 13/61 (21%) compared to 23% in the general population in the IFS 2010 (15). By six months of age, two (2/54 (4%)) participants were exclusively breast fed. This compares to 1% of general population. Using data from the initial and 7-month questionnaires, the median age at which some formula milk was introduced in the whole cohort was five days (IQR 1, 21 days). Formula feeds were introduced by 52% of mothers within a week in the IFS 2010 and 75% by 6 weeks.

| Types of feeds / Stopping breastfeeding          |                        |                       |                        |
|--------------------------------------------------|------------------------|-----------------------|------------------------|
| Age stopped breastfeeding*                       |                        |                       |                        |
| 6 weeks or less                                  | 11/27** (41%)          |                       |                        |
| > 6 weeks to 4 months                            | 7/27 (26%)             |                       |                        |
| > 4 months to 6 months                           | 3/27 (11%)             |                       |                        |
| > 6 months                                       | 6/27 (22%)             |                       |                        |
| Age started formula feeds                        |                        |                       |                        |
| 6 weeks or less                                  | 44/57*** (77%)         |                       |                        |
| > 6 weeks to 4 months                            | 3/57 (5%)              |                       |                        |
| > 4 months to 6 months                           | 5/57 (9%)              |                       |                        |
| > 6 months                                       | 5/57 (9%)              |                       |                        |
| Age when given a non – milk drink**** (weeks)    | Median 26 (IQR 20, 28) |                       |                        |
| Age at which first given cow’s milk (weeks)      | Median 44 (IQR 28, 48) |                       |                        |
| Stopping breastfeeding and problems with feeding | Initial Questionnaire  | 7 month Questionnaire | 12 month Questionnaire |
| Maternal opinion on how long they breastfed      |                        |                       |                        |
| Breastfed for as long as they intended           | 14/37(38%)             | 4/23 (17%)            | 4/20 (20%)             |
| Breastfed for longer than they intended          | 3/37 (8%)              | 3/23 (13%)            | 3/20 (15%)             |
| Would have liked to breastfeed longer.           | 20/37 (54%)            | 16/23 (70%)           | 13/20 (65%)            |
| Reasons for stopping breastfeeding               |                        |                       |                        |
| Inadequate breastmilk supply                     | 6/20 (30%)             | 7/54 (13%)            | 2/40 (5%)              |
| Problems expressing milk                         | 5/20 (25%)             | 3/54 (6%)             | 4/40 (10%)             |
| Excessive time expressing milk                   | 5/20 (25%)             | 1/54 (2%)             | 2/40 (5%)              |
| Baby losing weight                               | 4/20 (20%)             | 2/54 (4%)             | 2/40 (5%)              |
| Maternal medical problem                         | 3/20 (15%)             | 2/54 (4%)             | 1/40 (3%)              |
| Lethargy                                         | 1/20 (5%)              | 1/54 (2%)             |                        |
| Weaning by choice                                | n/a                    | 4/54 (7%)             | 3/40 (8%)              |
| Other                                            |                        | 3/54 (6%)             | 4/40 (10%)             |

Table 5: Stopping Breastfeeding

Footnote: \*including using expressed breastmilk and mixed feeding and/or were introduced to other types of milk feeds or drinks. \*\*this denominator is the number of women who had stopped breastfeeding by the data cut off date for data analysis. Some infants would still have been receiving breastmilk at the cut-off date for data analysis. Some would also have been still mixed feeding both breastmilk and formula \*\*\*\*Non-milk drinks included any drink other than milk including water (which would be fine) and juices which would not be recommended.

Just over half of the participants had problems associated with feeding after discharge from hospital (Table 3). The most common problems were lethargy or faltering growth. Three mothers mentioned their infants being readmitted to hospital with poor feeding. Less than



1  
2  
3 270 three-quarters, 34/47 (72%) had the correct 'DS insert' in their Red book (the personal child  
4  
5 271 health record that is given to every baby). The 'DS insert' contains the appropriate growth  
6  
7 272 charts reflecting a tendency to 'normal', slower growth trajectory in this condition compared  
8  
9 273 to non-trisomy infants (16).

10  
11  
12 274

13  
14 275 Over half of the mothers said that they would have liked to have breastfed for longer (20/37,  
15  
16 276 (54%)). Reasons for stopping breastfeeding included inadequate breastmilk supply, issues  
17  
18 277 with expressing breast milk and their infants having faltering growth. The quotes in Table 4  
19  
20 278 illustrate the reasons mothers gave for stopping breastfeeding.

21  
22  
23 279

24  
25 280 Mothers were asked "What would have helped you breastfeed longer?" the answers included  
26  
27 281 not introducing bottles as early, not needing to express, being at home and having more  
28  
29 282 specific support. Quotes from the initial, 7-month and 12-month questionnaires in response to  
30  
31 283 this question are given in Table 4. Some mothers also used this question to explain that they  
32  
33 284 did breastfeed.

34  
35  
36 285

#### 37 38 39 286 **Discussion:**

40  
41  
42 287

43  
44 288 In our cohort exclusive breastfeeding amongst the infants with DS at six months is  
45  
46 289 comparable to the general population (4% vs 1%). Apart from exclusive breastfeeding at six  
47  
48 290 weeks when prevalence was similar (21% of infants with DS versus 23% in the general  
49  
50 291 population), breastfeeding (exclusive or combination feeding) amongst the study participants  
51  
52 292 was higher at all time points than levels reported in the general population (15). This was  
53  
54 293 surprising and does not support the hypothesis that hypotonia and oro-motor issues associated  
55  
56 294 with DS significantly alters ability to breastfeed. This is an important and encouraging

1  
2  
3 295 message for mothers and should inspire midwives and health professionals to support breast  
4  
5 296 feeding. These findings suggest that the frequently heard mantra, that infants with DS  
6  
7 297 probably will not breastfeed successfully, needs to be changed.  
8  
9

10 298  
11  
12 299 Formula was introduced very early at a median of five days with 77% having started by the  
13  
14 300 age of six weeks. Overall, over half of the mothers were still breastfeeding beyond the age of  
15  
16 301 six months (including infants who combination fed with breastmilk and infant formula)  
17  
18 302 which is a very positive message for families. This is higher than the 34% at six months  
19  
20 303 within the general population. Due to the wording of the questionnaire, it was not possible to  
21  
22 304 distinguish between those who directly breastfed or those who gave expressed breastmilk,  
23  
24 305 and this would be useful to include in future questionnaires.  
25  
26  
27  
28  
29

30  
31 307 Over half of FADES infants were admitted to SCBU, all being NG tube fed. In around 40%,  
32  
33 308 issues with feeding were responsible for NG placement and for most of these participants,  
34  
35 309 this was also the reason for SCBU admission. Almost 70% of the mothers said that having  
36  
37 310 their baby in SCBU had affected their ability to feed the way they would have liked. This is  
38  
39 311 possibly open to intervention as some admissions might be prevented with more  
40  
41 312 specialised/tailored support on the postnatal wards. Some hospitals will only have one or two  
42  
43 313 infants born a year with DS, possibly leading to automatic SCBU admissions with increased  
44  
45 314 levels of anxiety around potential complications and associated conditions. In terms of oro-  
46  
47 315 motor skill development, it is important that infants have the chance to feed orally early on.  
48  
49 316 This is postulated to be important for the development of oral skills, tolerance of tastes and  
50  
51 317 textures and is also important for social development (17). Most infants in our cohort  
52  
53 318 required NG tube feeds for less than two weeks but a third also required feeds to be stopped  
54  
55 319 altogether at some point and were put onto intravenous fluids.  
56  
57  
58  
59  
60

1  
2  
3 320

4  
5 321 NG tube feeding was required for some infants due to dehydration, jaundice, polycythaemia  
6  
7 322 and vomiting. Although classified as a 'medical' reason, inability to feed may have  
8  
9 323 contributed or caused these issues. Other 'medical' reasons included prematurity, ventilation  
10  
11 324 or surgical abdomen. Prevalence of NG tube feeding in the general population and in the  
12  
13 325 typical DS population are poorly reported. A third of those NG fed infants continued to  
14  
15 326 receive exclusively expressed breastmilk. Many of the infants were fed using expressed  
16  
17 327 breastmilk either for NG tube feeds or for top up feeds via alternative feeding methods  
18  
19 328 including bottle.  
20  
21  
22  
23

24 329

25  
26 330 Lethargy was the most commonly reported problem with feeding after discharge with far  
27  
28 331 fewer citing poor latch than during the initial admission. Importantly 16% of the mothers said  
29  
30 332 that poor weight gain or weight loss was an issue. It is of concern that over a quarter of the  
31  
32 333 mothers reported that they were not given the correct 'DS insert' in their Personal Child  
33  
34 334 Health Record ('Red' book) (16). Healthy infants with DS gain weight more slowly than  
35  
36 335 other infants and it is important to account for this when assessing feeding and growth. If an  
37  
38 336 infant with DS is plotted on a standard growth chart they will appear to be failing to thrive  
39  
40 337 and a mother who is successfully feeding her baby, may be told that she needs to supplement  
41  
42 338 feeds, start formula feeds if she is breastfeeding or even that her baby needs admission to  
43  
44 339 hospital.  
45  
46  
47  
48

49 340

50  
51 341 Although the number of participants is relatively high compared to other cohorts of infants  
52  
53 342 with DS, the small number in this paper means that caution needs to be used when drawing  
54  
55 343 conclusions. Those infants born with a child protection plan, fostered, or adopted, and parents  
56  
57 344 who do not speak English did not meet the inclusion criteria. Therefore, we are likely to have  
58  
59  
60

1  
2  
3 345 excluded some of the most disadvantaged of our population. The higher levels of  
4  
5 346 breastfeeding in the study compared to the general population may in part, be due to selection  
6  
7 347 bias. Mothers who have chosen to take part in the study may already have a specific interest  
8  
9 348 in infant feeding. In the UK, higher breastfeeding frequency is described in mothers over 30  
10  
11 349 years of age (87%) (15) which may also explain the higher level of initial breastfeeding in  
12  
13 350 FADES. The karyotype for the infants in the cohort was not requested which might be  
14  
15 351 considered a weakness of the study. FADES potentially might include children with mosaic  
16  
17 352 Down syndrome who can be phenotypically milder although this is rare: Only one to three  
18  
19 353 percent of DS children have Mosaicism (18).  
20  
21  
22  
23

24 354  
25  
26 355 Reasons for stopping breastfeeding were similar to the IFS 2010 (15) with inadequate  
27  
28 356 breastmilk supply and faltering growth being common. However, a large proportion  
29  
30 357 mentioned issues surrounding expressing milk. This highlights the need for mothers who are  
31  
32 358 expressing to receive tailored support. Mothers were asked “What would have helped you  
33  
34 359 breastfeed longer” the responses indicated that mothers understandably wanted ‘normality’,  
35  
36 360 they wanted their infants to be well, to not require bottle or expressed milk and to be at home.  
37  
38 361 Although it is not possible to change these factors for many, every effort should be made to  
39  
40 362 listen to maternal wishes and assist where possible. Some mothers used this questionnaire to  
41  
42 363 voice their frustration at alternative feeding methods being introduced ‘too early’ or ‘against  
43  
44 364 their wishes’.  
45  
46  
47  
48

49 365  
50  
51 366 It is a strength of the study that the families recruited were representative of the general  
52  
53 367 population of children with DS, with similar numbers of children having associated  
54  
55 368 conditions including cardiac abnormalities as reported in other studies (19). The eligibility  
56  
57 369 criteria were broad and did not exclude any medical conditions. A further strength is that the  
58  
59  
60

1  
2  
3 370 study was UK wide reducing selection bias. Those who could not speak English were  
4  
5 371 excluded and this may have had altered feeding results with cultural differences in early  
6  
7 372 feeding (20). Translating all study documentation however was not possible for the multiple  
8  
9 373 languages now represented in UK population.  
10

11  
12 374

13  
14 375 These results raise some important questions and highlight potential opportunities for  
15  
16 376 interventions in relation to feeding support for mothers of infants with DS. Any advice given  
17  
18 377 to mothers on feeding a baby with DS based on this study should include the message that  
19  
20 378 infants with DS can be exclusively breastfed or receive a combination of breast and formula  
21  
22 379 feeds. However, some may need to include expressed breastmilk and alternative feeding  
23  
24 380 methods. Providing mothers with access to tailored support and advice specifically around  
25  
26 381 expressing should be included, as should information on NG tube feeding.  
27  
28  
29

30  
31 382

32  
33 **Conclusion:**

34  
35 384 It is clear that many infants with DS in our cohort can breastfeed exclusively for six months  
36  
37 385 as per WHO guidelines. Our study shows that almost two-thirds of babies with DS were  
38  
39 386 being breast fed at 6 months. This may require significant perseverance from the mother and  
40  
41 387 supportive professionals, as establishing breastfeeding can be challenging. Oro-motor  
42  
43 388 difficulties and significant medical needs may underlie some challenges, but overall, mothers  
44  
45 389 who wish to breastfeed should be encouraged and supported to do so as success is possible.  
46  
47  
48

49 390

50  
51 391

52  
53 392

54  
55  
56 393 Boxes – What is already known on this topic (bullet points)  
57  
58  
59  
60

- 1  
2  
3 394 • Infants with DS have anatomical and physiological features that may affect their  
4  
5 ability to feed but this is phenotypically variable.  
6 395  
7  
8 396 • Infants with DS have associated medical conditions including congenital heart  
9  
10 disease and gastro-intestinal abnormalities which may impact on early feeding.  
11 397  
12  
13 398 • Prevalence of NG Tube feeding in infants with DS has previously been reported as up  
14  
15 to 40%.  
16 399  
17

400

## 401 What this study adds

- 22 402 • Breastfeeding prevalence amongst infants with DS are equivalent to the general  
23  
24 population at 6 months.  
25 403  
26  
27 404 • Infants with DS can receive exclusive breast-milk feeds for over 6 months.  
28  
29  
30 405 • Early and extra post-natal support for breast feeding may be beneficial.  
31  
32  
33 406 • At least half of infants with DS in this UK wide cohort study receive nasogastric feeds.  
34

407

## 408 How this Study might affect research, practice or policy

- 39 409 • This study seeks to promote an increase in tailored feeding support for mother's of  
40  
41 infants with DS.  
42 410  
43  
44 411 • Key findings from this study may contribute to positive changes in breastfeeding  
45  
46 advice and support for mother's of infants with DS.  
47 412  
48  
49 413 • The high prevalence of infants receiving naso-gastric tube feeds warrants further  
50  
51 research and potentially change in policy within neonatal units.  
52 414  
53

415

56 416 **Funding Statement:** This work was supported by the NIHR Bristol Biomedical Research  
57  
58 Centre Nutrition Theme.  
59 417  
60

1  
2  
3 418 **Competing interests:** No competing interests

4  
5 419 **Authors Contribution:** Georgina M.G. Williams was the chief investigator and PhD student,  
6  
7  
8 420 wrote the protocol, completed the data collection, data analysis and drafts of the manuscript.  
9  
10 421 Sam Leary was the lead statistician on the study and PhD supervisor. She contributed to the  
11  
12 422 protocol and study design, data analysis and draft manuscripts of the paper. Sofia Leadbetter  
13  
14 423 provided the administrative support and coordination for the study, she was involved in  
15  
16 424 participant recruitment and data collection. Stu Toms contributed to the study design, online  
17  
18 425 questionnaires and managed the study database. Georgina Mortimer contributed to the data  
19  
20 426 collection and coordinates sample collection for the FADES study. Tim Scorrer recruited  
21  
22 427 participants for the study and reviewed draft manuscripts of the paper. Kathleen Gillespie  
23  
24 428 (PhD supervisor) contributed to the study protocol, study design and reviewed draft  
25  
26 429 manuscripts of the article. Julian Hamilton Shield (PhD supervisor) contributed to the study  
27  
28 430 protocol, study design and reviewed draft manuscripts of the articles.  
29  
30

31  
32  
33 431 **Data Sharing:** Data sets may only be available by individual request to the Corresponding  
34  
35 432 Author.  
36  
37

38 433

39  
40 434 **References**

- 41  
42 435 1. Kliegman, Robert M. (2011). "Down Syndrome and Other Abnormalities of  
43 436 Chromosome Number". Nelson textbook of pediatrics (19th ed.). Philadelphia:  
44 437 Saunders. pp. Chapter 76.2. ISBN 978-1-4377-0755-7  
45 438 2. Kumin L, Von Hagel KC, Bahr DC. An effective oral motor intervention protocol for  
46 439 infants and toddlers with low muscle tone. *Infant Toddler Intervention*. 2001  
47 440 Sep;11(3/4):181-200.  
48 441 3. Kumin L, Bahr DC. Patterns of feeding, eating, and drinking in young children with  
49 442 Down syndrome with oral motor concerns. *Down Syndrome Quarterly*. 1999  
50 443 Jun;4(2):1-8.  
51 444 4. Lewis E, Kritzinger A. Parental experiences of feeding problems in their infants with  
52 445 Down syndrome. *Down Syndrome Research and Practice*. 2004 Jan 1;9(2):45-52.  
53 446 5. World Health Organisation. 2009. "The optimal duration of exclusive breastfeeding:  
54 447 report of an expert consultation. 2002." World Health Organisation: Geneva.  
55 448 6. Malcova H, Sumnik Z, Drevinek P, Venhacova J, Lebl J, Cinek O. Absence of breast-  
56 449 feeding is associated with the risk of type 1 diabetes: a case-control study in a

- 1  
2  
3 450 population with rapidly increasing incidence. *European journal of pediatrics*. 2006  
4 451 Feb;165(2):114-9.
- 5  
6 452 7. Sollid LM. Breast milk against coeliac disease. *Gut*. 2002 Dec 1;51(6):767-8
- 7 453 8. Akobeng AK, Ramanan AV, Buchan I, Heller RF. Effect of breast feeding on risk of  
8 454 coeliac disease: a systematic review and meta-analysis of observational studies.  
9 455 *Archives of disease in childhood*. 2006 Jan 1;91(1):39-43.
- 10 456 9. Bowatte G, Tham R, Allen KJ, Tan DJ, Lau MX, Dai X, Lodge CJ. Breastfeeding and  
11 457 childhood acute otitis media: a systematic review and meta-analysis. *Acta*  
12 458 *Paediatrica*. 2015 Dec;104:85-95
- 13 459 10. Bloemers BL, Broers CJ, Bont L, Weijerman ME, Gemke RJ, van Furth AM. Increased  
14 460 risk of respiratory tract infections in children with Down syndrome: the consequence  
15 461 of an altered immune system. *Microbes and infection*. 2010 Oct 1;12(11):799-808.
- 16 462 11. CDSS. 2018. "The Children with Downs Syndrome Study." accessed 12.11.2018.  
17 463 <https://www.cdss.org.uk>.
- 18 464 12. LonDownS Consortium. [www.ucl.ac.uk/london-down-syndrome-consortium](http://www.ucl.ac.uk/london-down-syndrome-consortium)
- 19 465 13. Cunningham, Cliff. 1996. "Families of children with Down syndrome." *Down*  
20 466 *Syndrome Research and Practice* 4 (3):87-95.
- 21 467 14. Carr, Janet. 1988. "Six weeks to twenty-one years old: A longitudinal study of  
22 468 children with Down's syndrome and their families." *Journal of child Psychology and*  
23 469 *Psychiatry* 29 (4):407-431.
- 24 470 15. McAndrew F, Thompson J, Fellows L, Large A, Speed M, Renfrew MJ. Infant feeding  
25 471 survey 2010. Leeds: health and social care information Centre. 2012 Nov 20;2(1).
- 26 472 16. DSMIG. 2019b. "Personal Child Health Record, Down Syndrome Medical Interest  
27 473 Group." accessed 04.07.2019. [https://www.dsmig.org.uk/information-](https://www.dsmig.org.uk/information-resources/personal-child-health-record-pchr/)  
28 474 [resources/personal-child-health-record-pchr/](https://www.dsmig.org.uk/information-resources/personal-child-health-record-pchr/).
- 29 475 17. Mason SJ, Harris G, Blissett J. Tube feeding in infancy: implications for the  
30 476 development of normal eating and drinking skills. *Dysphagia*. 2005 Mar;20(1):46-61.
- 31 477 18. Devlin L, Morrison PJ. Mosaic Down's syndrome prevalence in a complete population  
32 478 study. *Archives of disease in childhood*. 2004 Dec 1;89(12):1177-8.
- 33 479 19. Roizen, Nancy J, and David Patterson. 2003. "Down's syndrome." *The Lancet* 361  
34 480 (9365):1281-1289.
- 35 481 20. Griffiths LJ, Tate AR, Dezateux C. The contribution of parental and community  
36 482 ethnicity to breastfeeding practices: evidence from the Millennium Cohort Study.  
37 483 *International Journal of Epidemiology*. 2005 Dec 1;34(6):1378-86  
38 484
- 39  
40  
41  
42  
43  
44  
45  
46  
47 485  
48  
49 486  
50 487  
51 488  
52 489  
53 490  
54 491  
55  
56  
57  
58  
59  
60
